# Supplementary material for: Association between the Number of Childbirths and the Progress of Atherosclerosis among Women with Diabetes: A Cohort Study Based on Chinese Population
Source: Hindawi journal article supplement (doi:10.1155/2019/4874121), 2019-01-27
Supplement: f1 [file 4874121.f1.pdf]

Supplemental materials

Figure S1-S14

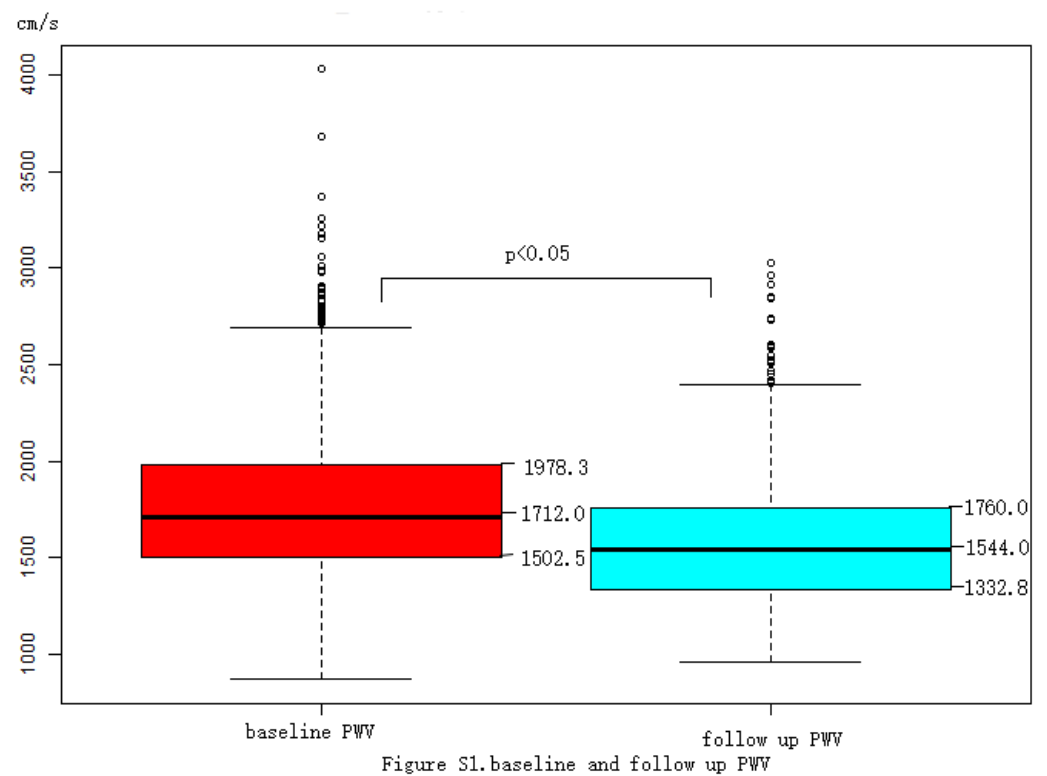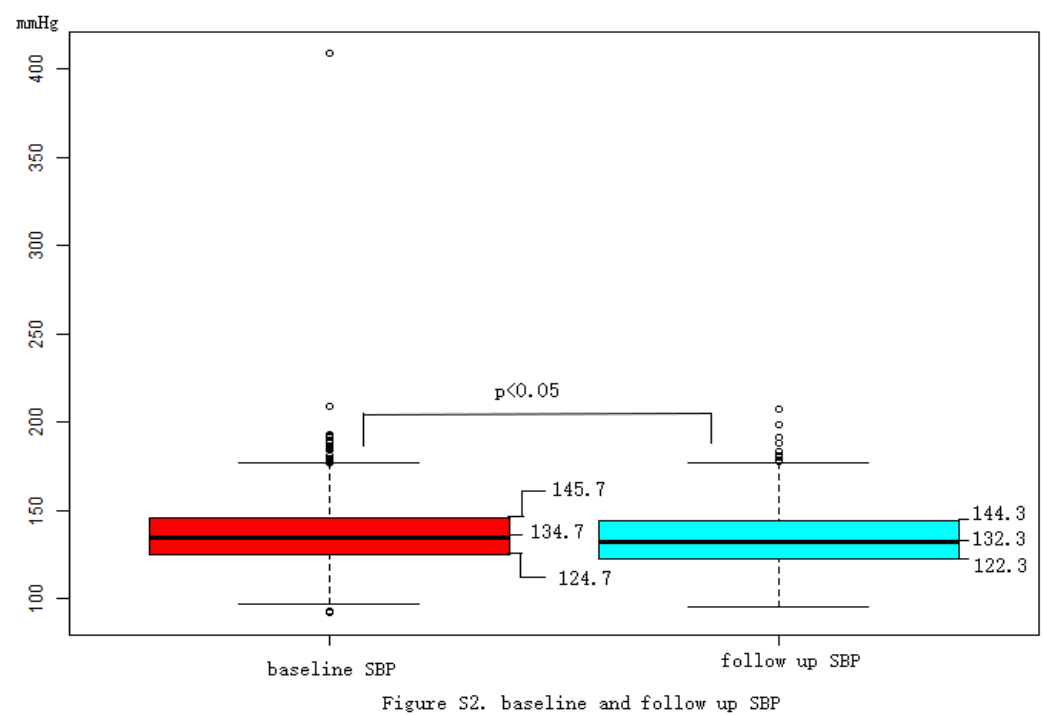

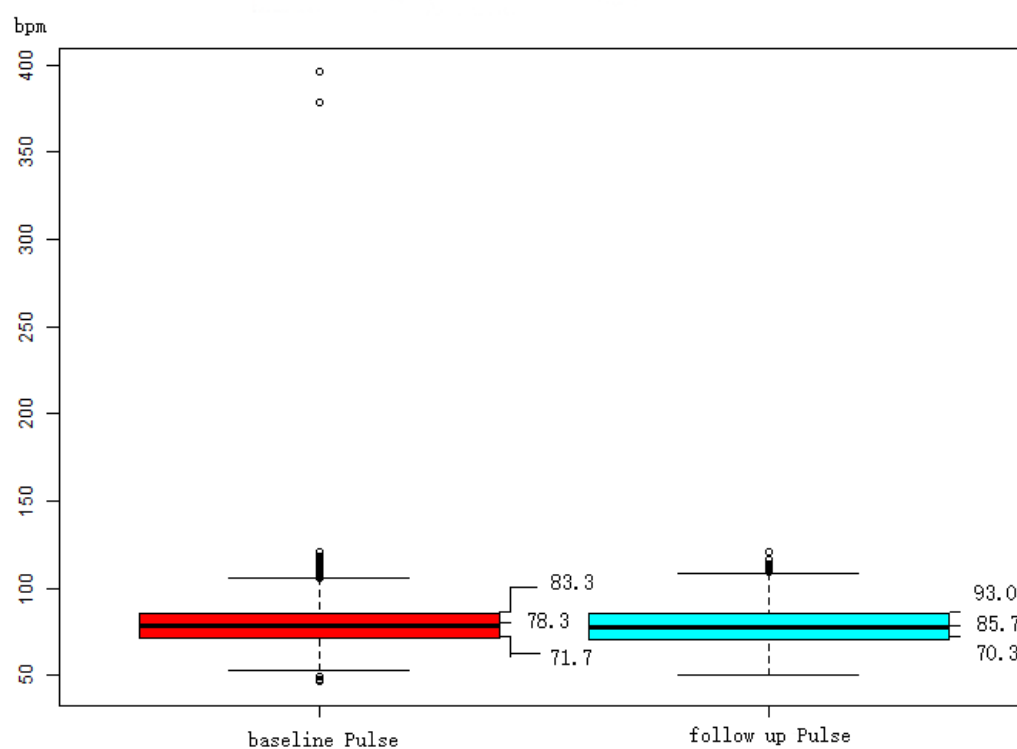

Figure S3. baseline and follow up pulse

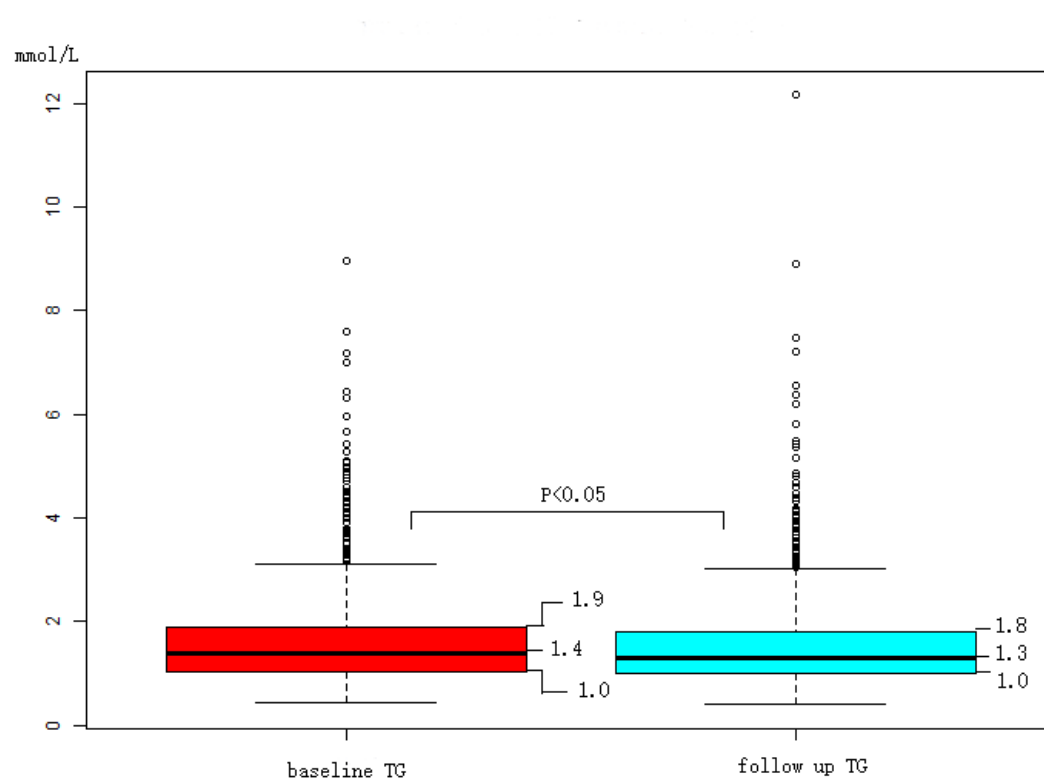

Figure S4. baseline and follow up TG

mL/min/1.73 m<sup>2</sup>

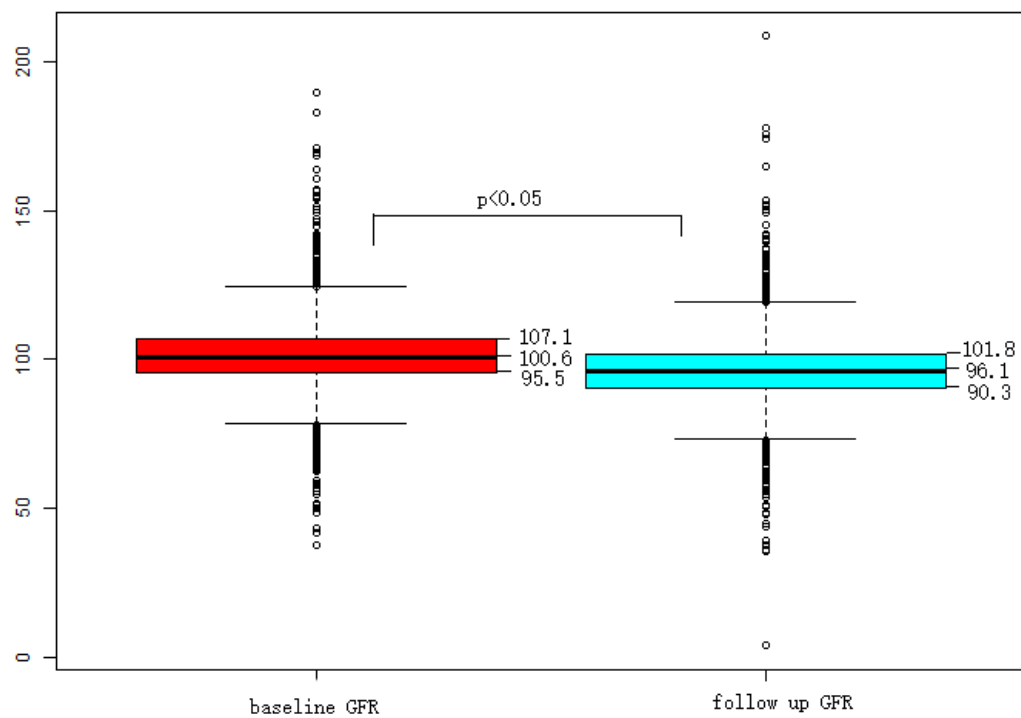

Figure S5.baseline and follow up GFR

mmol/L

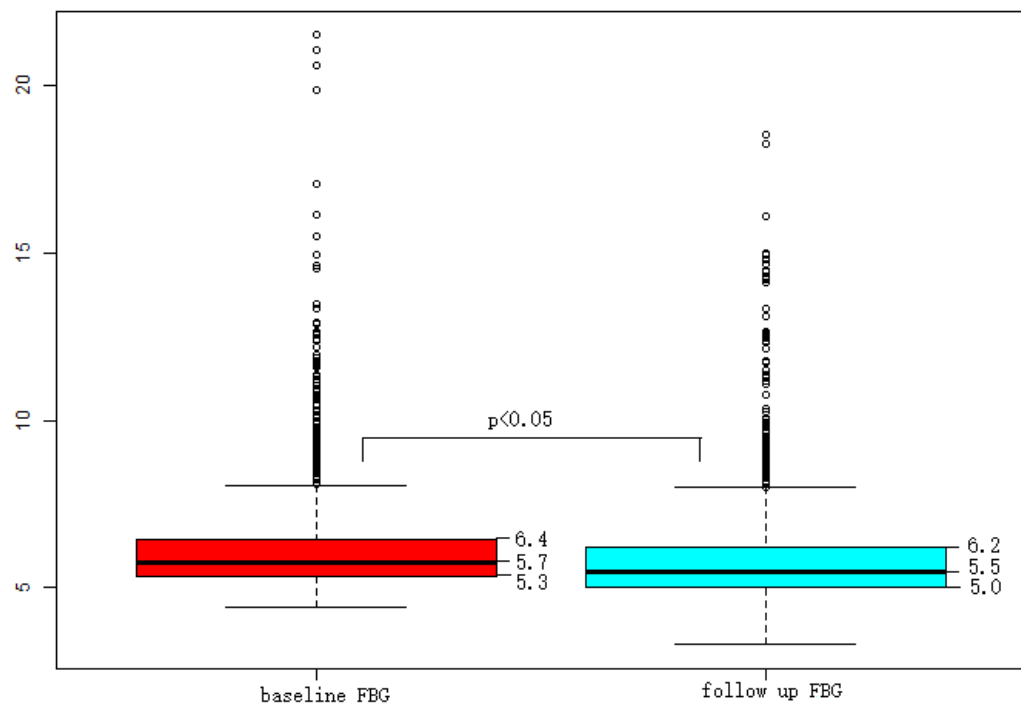

Figure S6.baseline and follow up FBG

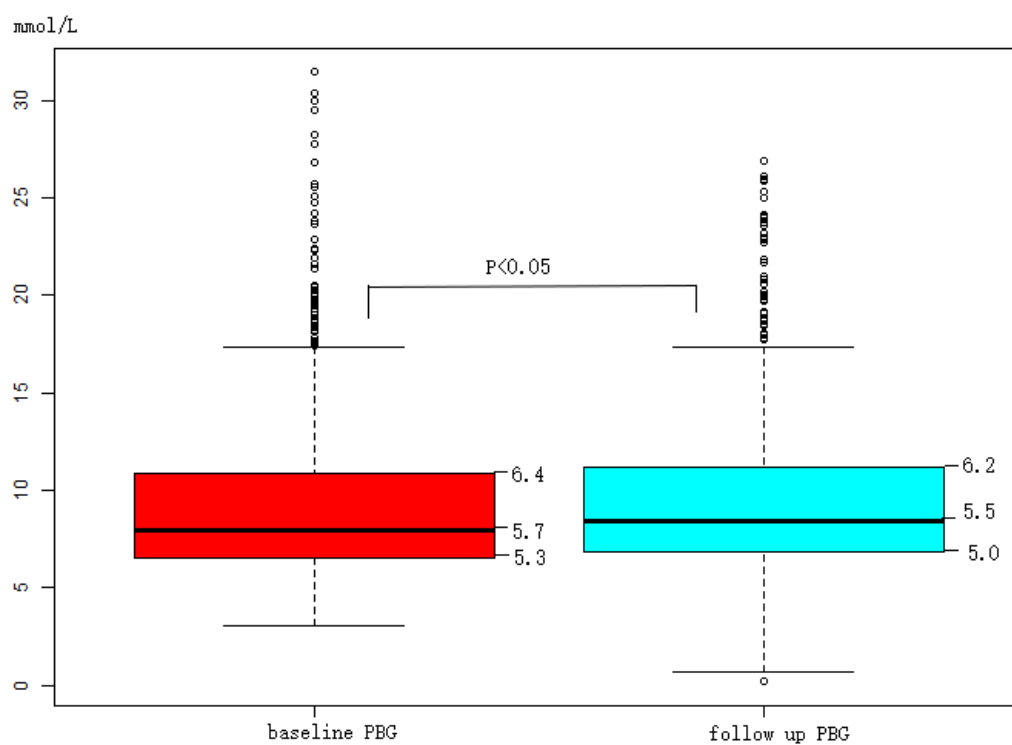

Figure S7.baseline and follow up PBG

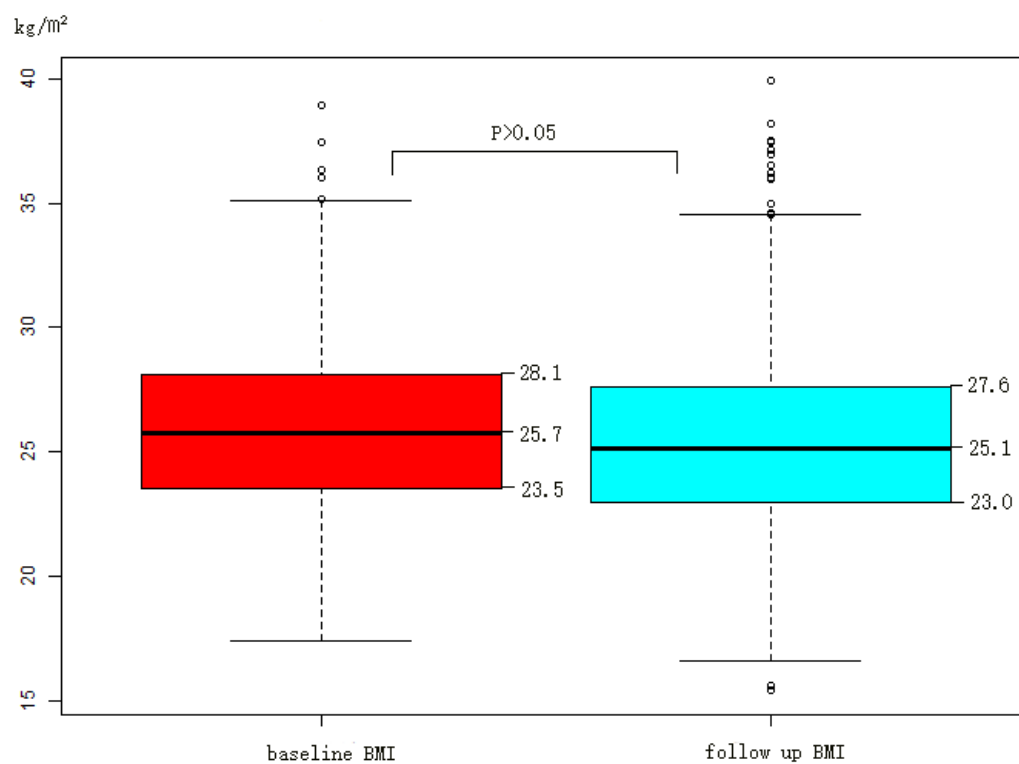

Figure S8.baseline and follow up BMI

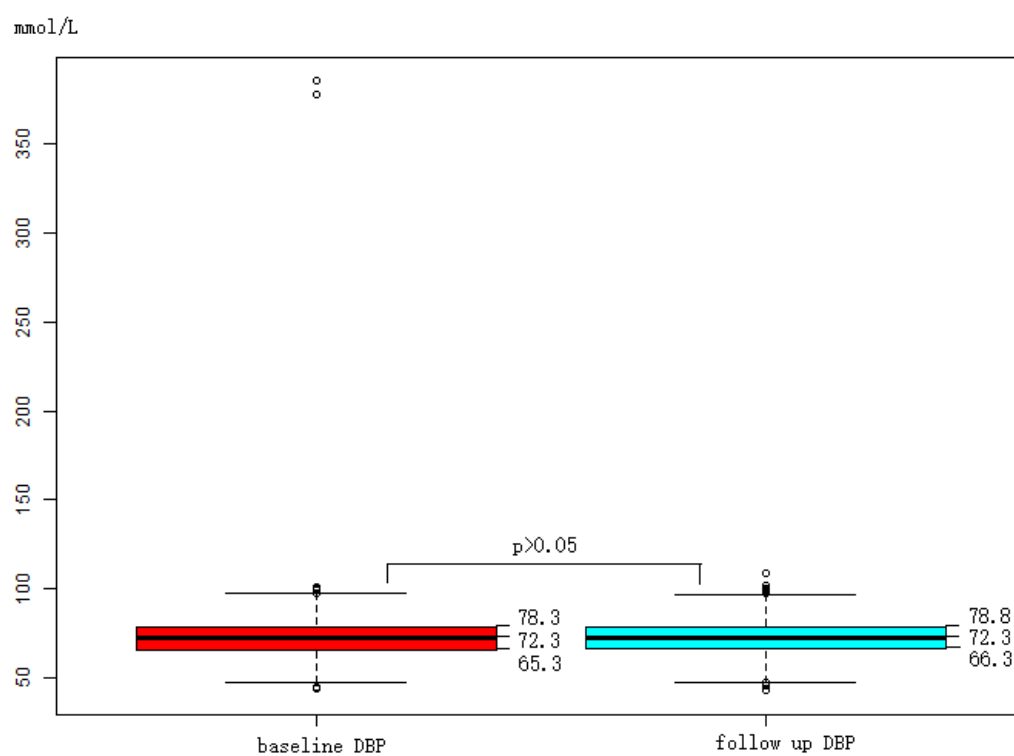

Figure S9. baseline and follow up DBP

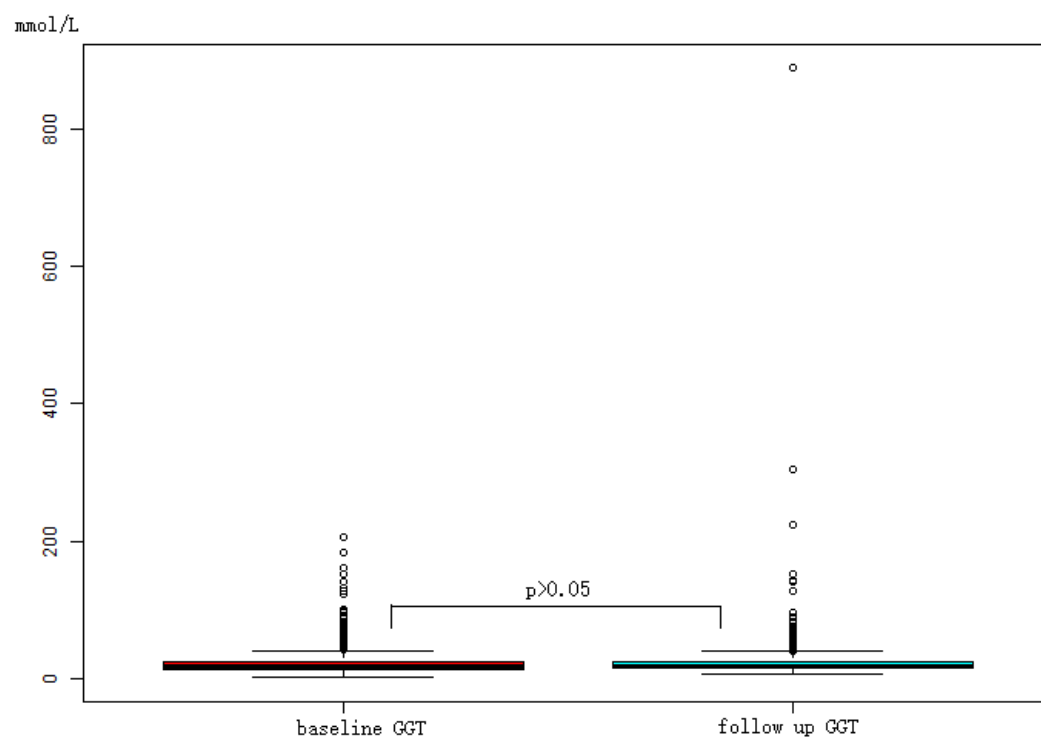

Figure S10. baseline and follow up GGT

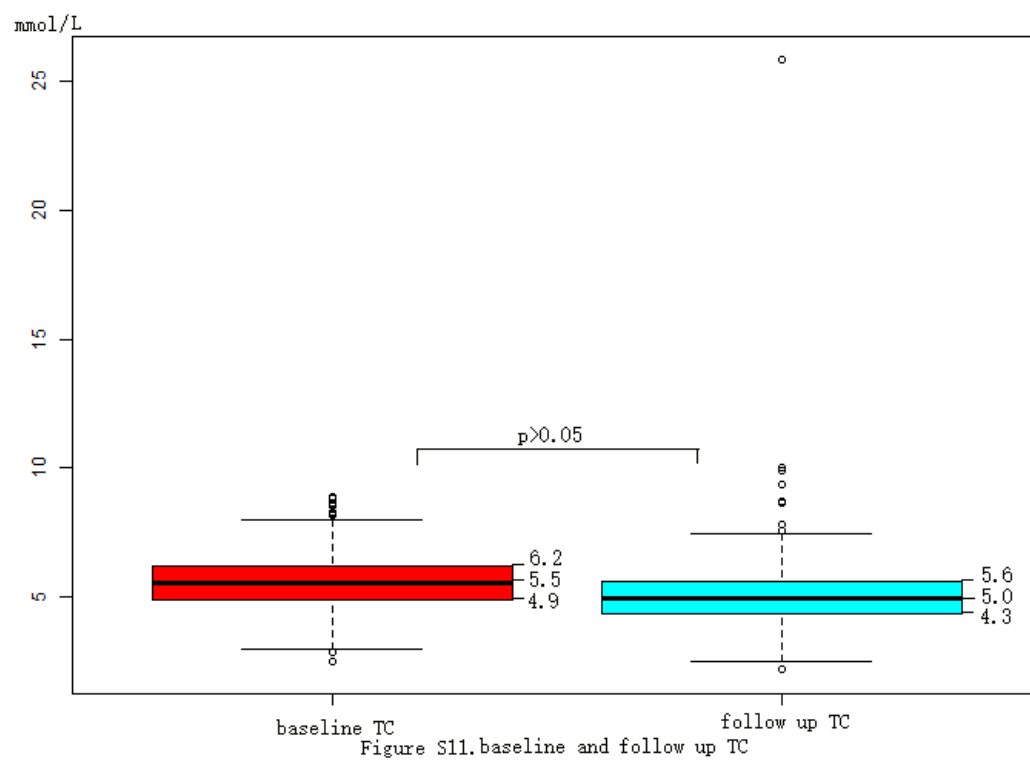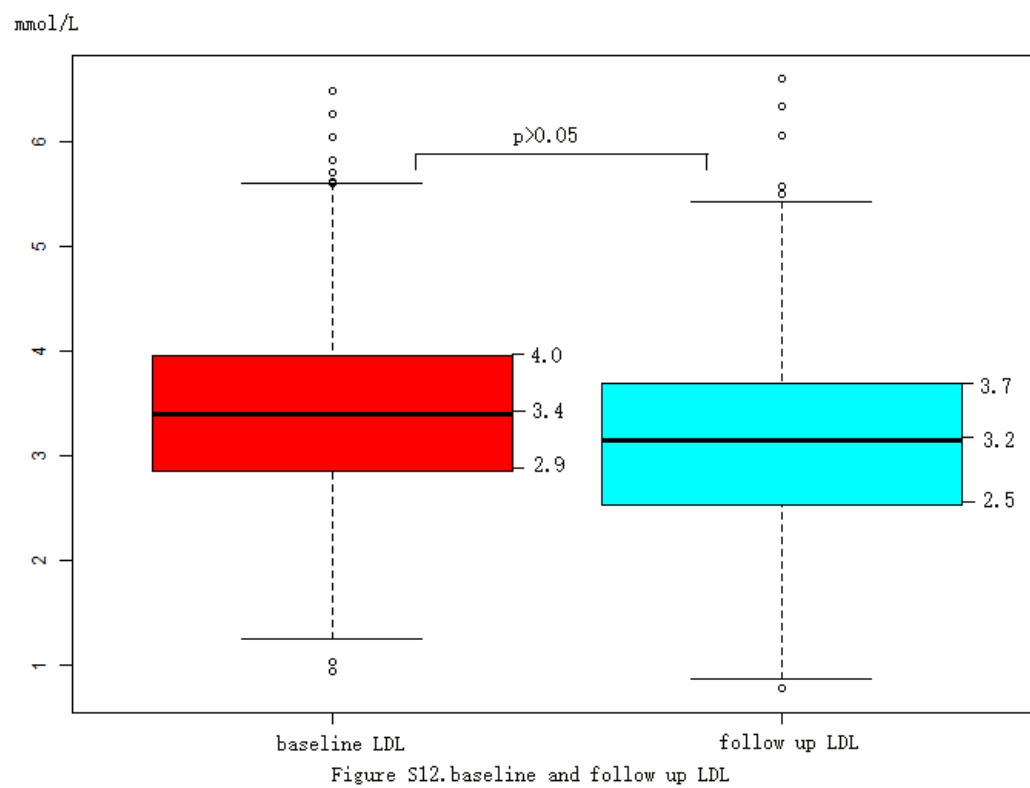

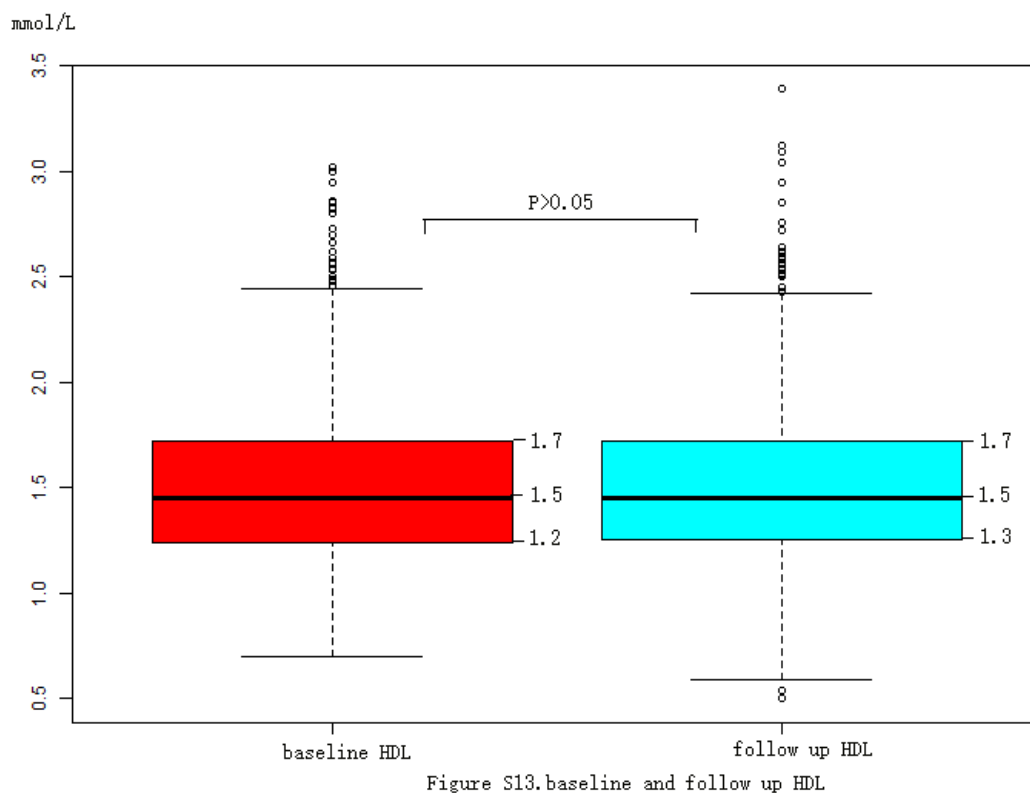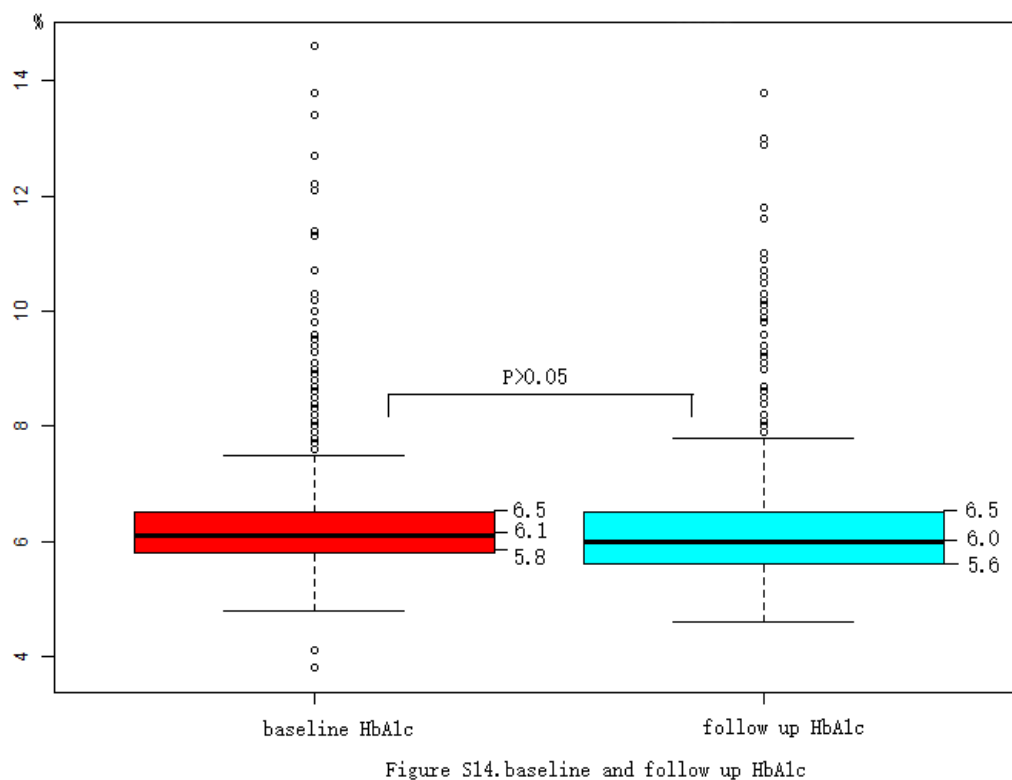

Table S1 Logistic and liner regression analysis in hypertension history subgroups

| Exposure                  | N   | %    | Non-adjusted               | Adjust I                   | Adjust II                  |
|---------------------------|-----|------|----------------------------|----------------------------|----------------------------|
|                           |     |      | OR (95%CI) <i>P</i> -value | OR (95%CI) <i>P</i> -value | OR (95%CI) <i>P</i> -value |
| Hypertension Yes          |     |      |                            |                            |                            |
| PWV (cm/s) Category       |     |      |                            |                            |                            |
| The number of childbirths |     |      |                            |                            |                            |
| 1                         | 265 | 18.9 | 1.0                        | 1.0                        | 1.0                        |
| 2                         | 243 | 24.7 | 1.4 (0.9, 2.2) 0.112       | 1.8 (1.0, 3.5) 0.060       | 1.9 (1.0, 3.7) 0.052       |
| ≥3                        | 172 | 25.6 | 1.5 (0.9, 2.3) 0.096       | 1.9 (0.7, 4.8) 0.197       | 1.7 (0.6, 4.4) 0.305       |
| P for trend               |     |      | 0.066                      | 0.229                      | 0.309                      |
| Continuous PWV (cm/s)     |     |      |                            |                            |                            |
| The number of childbirths |     |      |                            |                            |                            |
| 1                         | 265 | 18.9 | 0                          | 0                          | 0                          |
| 2                         | 243 | 24.7 | -9.6 (-71.3, 52.0) 0.759   | 71.2 (-15.2, 157.6) 0.107  | 77.0 (-11.3, 165.4) 0.088  |
| ≥3                        | 172 | 25.6 | -23.2 (-91.2, 44.7) 0.503  | 102.8 (-26.0, 231.5) 0.118 | 96.2 (-36.6, 229.1) 0.156  |
| P for trend               |     |      | 0.505                      | 0.109                      | 0.135                      |
| Hypertension No           |     |      |                            |                            |                            |
| PWV (cm/s) Category       |     |      |                            |                            |                            |
| The number of childbirths |     |      |                            |                            |                            |
| 1                         | 262 | 29.4 | 1.0                        | 1.0                        | 1.0                        |
| 2                         | 140 | 29.3 | 1.0 (0.6, 1.6) 0.983       | 1.1 (0.6, 2.2) 0.698       | 1.1 (0.6, 2.1) 0.800       |
| ≥3                        | 77  | 26.0 | 0.8 (0.5, 1.5) 0.560       | 1.3 (0.4, 3.9) 0.613       | 1.3 (0.4, 3.8) 0.690       |



|                           |     |       |                           |                           |
|---------------------------|-----|-------|---------------------------|---------------------------|
| P for trend               |     | 0.492 | 0.612                     | 0.729                     |
| Continuous PWV (cm/s)     |     |       |                           |                           |
| The number of childbirths |     |       |                           |                           |
| 1                         | 262 | 29.4  | 0                         | 0                         |
| 2                         | 140 | 29.3  | 7.0 (-47.3, 61.3) 0.801   | 36.1 (-37.6, 109.7) 0.337 |
| ≥3                        | 77  | 26.0  | -47.6 (-114.8, 19.6)      | 47.5 (-73.4, 168.4) 0.441 |
|                           |     | 0.165 |                           | 46.8 (-76.3, 169.8) 0.457 |
| P for trend               |     | 0.277 | 0.364                     | 0.380                     |
| Total                     |     |       |                           |                           |
| PWV (cm/s) Category       |     |       |                           |                           |
| The number of childbirths |     |       |                           |                           |
| 1                         | 527 | 24.1  | 1.0                       | 1.0                       |
| 2                         | 383 | 26.4  | 1.2 (0.9, 1.6) 0.282      | 1.4 (0.9, 2.2) 0.107      |
| ≥3                        | 249 | 25.7  | 1.2 (0.8, 1.7) 0.395      | 1.6 (0.8, 3.1) 0.189      |
| P for trend               |     | 0.346 | 0.179                     | 0.177                     |
| Continuous PWV (cm/s)     |     |       |                           |                           |
| The number of childbirths |     |       |                           |                           |
| 1                         | 527 | 24.1  | 0                         | 0                         |
| 2                         | 383 | 26.4  | -3.5 (-45.9, 38.9) 0.872  | 52.5 (-5.3, 110.3) 0.076  |
| ≥3                        | 249 | 25.7  | -30.7 (-79.4, 18.1) 0.218 | 81.7 (-7.0, 170.5) 0.071  |
| P for trend               |     | 0.256 | 0.058                     | 0.056                     |

Non-adjusted model adjusted for nothing

Adjusted model I adjusted for age; BMI; SBP; DBP; TG; GGT; LDL-C; HDL-C; FBG; PBG; HbA1c ; CHD history; hyperlipidemia history; age at first

gestation; age at menopause; number of pregnancies; smoking status; drinking status; antihypertensive drug use; hypoglycemic drug use

Adjusted model II adjusted for adjusted model I + TC; hypertensive disorder complicating pregnancy (HDCP); gestational diabetes mellitus (GDM)

**Table S2. Liner regression analysis between follow up PWV and the number of childbirths in hypertension history subgroups**

| Exposure                  | N   | %    | Non-adjusted                | Adjust I                   | Adjust II                  |
|---------------------------|-----|------|-----------------------------|----------------------------|----------------------------|
|                           |     |      | OR (95%CI) <i>P</i> -value  | OR (95%CI) <i>P</i> -value | OR (95%CI) <i>P</i> -value |
| <b>Hypertension Yes</b>   |     |      |                             |                            |                            |
| The number of childbirths |     |      |                             |                            |                            |
| 1                         | 265 | 18.9 | 0                           | 0                          | 0                          |
| 2                         | 243 | 24.7 | 127.7 (73.6, 181.9) <0.001  | 55.3 (-12.0, 122.7) 0.108  | 54.1 (-14.4, 122.6) 0.122  |
| ≥3                        | 172 | 25.6 | 205.8 (146.1, 265.5) <0.001 | 74.4 (-26.0, 174.7) 0.147  | 66.0 (-37.0, 169.0) 0.210  |
| P for trend               |     |      | <0.001                      | 0.134                      | 0.185                      |
| <b>Hypertension No</b>    |     |      |                             |                            |                            |
| The number of childbirths |     |      |                             |                            |                            |
| 1                         | 262 | 29.4 | 0                           | 0                          | 0                          |
| 2                         | 140 | 29.3 | 96.2 (37.7, 154.6) 0.001    | 37.7 (-27.9, 103.4) 0.261  | 35.2 (-32.2, 102.5) 0.307  |
| ≥3                        | 77  | 26.0 | 212.9 (140.5, 285.2) <0.001 | 35.8 (-72.0, 143.7) 0.515  | 27.6 (-82.6, 137.9) 0.623  |
| P for trend               |     |      | <0.001                      | 0.383                      | 0.476                      |
| <b>Total</b>              |     |      |                             |                            |                            |
| Continuous PWV (cm/s)     |     |      |                             |                            |                            |

| The number of childbirths |     |      |                             |                           |                           |
|---------------------------|-----|------|-----------------------------|---------------------------|---------------------------|
| 1                         | 527 | 24.1 | 0                           | 0                         | 0                         |
| 2                         | 383 | 26.4 | 115.0 (75.2, 154.8) <0.001  | 47.2 (0.0, 94.5) 0.050    | 45.4 (-2.5, 93.4) 0.064   |
| ≥3                        | 249 | 25.7 | 206.3 (160.5, 252.1) <0.001 | 59.8 (-12.7, 132.3) 0.106 | 56.3 (-17.6, 130.2) 0.136 |
| P for trend               |     |      | <0.001                      | 0.078                     | 0.100                     |

Non-adjusted model adjusted for nothing

Adjusted model I adjusted for age; BMI; SBP; DBP; TG; GGT; LDL-C; HDL-C; FBG; PBG; HbA1c ; baseline PWV; CHD history; hyperlipidemia history;

age at first gestation; age at menopause; number of pregnancies; smoking status; drinking status; antihypertensive drug use; hypoglycemic drug use

Adjusted model II adjusted for adjusted model I + TC; hypertensive disorder complicating pregnancy (HDCP); gestational diabetes mellitus (GDM)

**Table S3. Logistic and liner regression analysis in diabetes history subgroups**

| Exposure                  | N   | %    | Non-adjusted               | Adjust I                   | Adjust II                  |
|---------------------------|-----|------|----------------------------|----------------------------|----------------------------|
|                           |     |      | OR (95%CI) <i>P</i> -value | OR (95%CI) <i>P</i> -value | OR (95%CI) <i>P</i> -value |
| Diabetes Yes              |     |      |                            |                            |                            |
| PWV (cm/s) Category       |     |      |                            |                            |                            |
| The number of childbirths |     |      |                            |                            |                            |
| 1                         | 156 | 17.3 | 1.0                        | 1.0                        | 1.0                        |
| 2                         | 155 | 29.7 | 2.0 (1.2, 3.5) 0.011       | 3.5 (1.5, 7.9) 0.003       | 3.1 (1.3, 7.2) 0.009       |
| ≥3                        | 123 | 26.8 | 1.8 (1.0, 3.1) 0.056       | 4.4 (1.3, 14.5) 0.015      | 4.1 (1.2, 14.3) 0.028      |
| P for trend               |     |      | 0.050                      | 0.032                      | 0.017                      |
| Continuous PWV (cm/s)     |     |      |                            |                            |                            |
| The number of childbirths |     |      |                            |                            |                            |

|                           |     |      |                            |                            |                            |
|---------------------------|-----|------|----------------------------|----------------------------|----------------------------|
| 1                         | 156 | 17.3 | 0                          | 0                          | 0                          |
| 2                         | 155 | 29.7 | 58.2 (-23.3, 139.6) 0.162  | 130.3 (22.4, 238.1) 0.018  | 105.1 (-6.1, 216.3) 0.065  |
| ≥3                        | 123 | 26.8 | -19.6 (-106.1, 67.0) 0.658 | 140.5 (-21.0, 302.1) 0.089 | 118.1 (-48.5, 284.7) 0.166 |
| P for trend               |     |      | 0.755                      | 0.022                      | 0.038                      |
| Diabetes No               |     |      |                            |                            |                            |
| PWV (cm/s) Category       |     |      |                            |                            |                            |
| The number of childbirths |     |      |                            |                            |                            |
| 1                         | 371 | 27.0 | 1.0                        | 1.0                        | 1.0                        |
| 2                         | 228 | 24.1 | 0.9 (0.6, 1.3) 0.443       | 1.0 (0.6, 1.7) 0.910       | 0.9 (0.5, 1.6) 0.781       |
| ≥3                        | 126 | 24.6 | 0.9 (0.6, 1.4) 0.605       | 1.0 (0.4, 2.4) 0.925       | 0.8 (0.3, 2.1) 0.680       |
| P for trend               |     |      | 0.442                      | 0.997                      | 0.669                      |
| Continuous PWV (cm/s)     |     |      |                            |                            |                            |
| The number of childbirths |     |      |                            |                            |                            |
| 1                         | 371 | 27.0 | 0                          | 0                          | 0                          |
| 2                         | 228 | 24.1 | -54.1 (-102.9, -5.4) 0.030 | 10.1 (-58.7, 78.9) 0.773   | 11.1 (-58.9, 81.2) 0.755   |
| ≥3                        | 126 | 24.6 | -48.0 (-107.7, 11.8) 0.116 | 59.1 (-49.4, 167.5) 0.286  | 45.2 (-65.8, 156.2) 0.425  |
| P for trend               |     |      | 0.042                      | 0.496                      | 0.562                      |
| Total                     |     |      |                            |                            |                            |
| PWV (cm/s) Category       |     |      |                            |                            |                            |
| The number of childbirths |     |      |                            |                            |                            |
| 1                         | 527 | 24.1 | 1.0                        | 1.0                        | 1.0                        |
| 2                         | 383 | 26.4 | 1.1 (0.8, 1.5) 0.404       | 1.4 (0.9, 2.2) 0.122       | 1.4 (0.9, 2.1) 0.182       |

|                                  |     |      |                           |                          |                           |
|----------------------------------|-----|------|---------------------------|--------------------------|---------------------------|
| <b>≥3</b>                        | 249 | 25.7 | 1.1 (0.8, 1.6) 0.570      | 1.6 (0.8, 3.1) 0.198     | 1.5 (0.8, 3.0) 0.239      |
| <b>P for trend</b>               |     |      | 0.529                     | 0.168                    | 0.116                     |
| <b>Continuous PWV (cm/s)</b>     |     |      |                           |                          |                           |
| <b>The number of childbirths</b> |     |      |                           |                          |                           |
| <b>1</b>                         | 527 | 24.1 | 0                         | 0                        | 0                         |
| <b>2</b>                         | 383 | 26.4 | -13.7 (-56.6, 29.2) 0.532 | 52.8 (-5.0, 110.6) 0.074 | 50.3 (-8.2, 108.8) 0.092  |
| <b>≥3</b>                        | 249 | 25.7 | -43.0 (-92.5, 6.5) 0.089  | 87.2 (-1.5, 175.9) 0.054 | 77.7 (-12.7, 168.1) 0.092 |
| <b>P for trend</b>               |     |      | 0.097                     | 0.023                    | 0.029                     |

Non-adjusted model adjusted for nothing

Adjusted model I adjusted for age; BMI; SBP; DBP; TG; GGT; LDL-C; HDL-C; FBG; PBG; HbA1c ; CHD history; hyperlipidemia history; age at first

gestation; age at menopause; number of pregnancies; smoking status; drinking status; antihypertensive drug use; hypoglycemic drug use

Adjusted model II adjusted for adjusted model I + TC; hypertensive disorder complicating pregnancy (HDCP); gestational diabetes mellitus (GDM)

Table S4. Liner regression analysis between follow up PWV and the number of childbirths in diabetes history subgroups

| Exposure                  | N   | %    | Non-adjusted                | Adjust I                   | Adjust II                  |
|---------------------------|-----|------|-----------------------------|----------------------------|----------------------------|
|                           |     |      | OR (95%CI) <i>P</i> -value  | OR (95%CI) <i>P</i> -value | OR (95%CI) <i>P</i> -value |
| Diabetes Yes              |     |      |                             |                            |                            |
| The number of childbirths |     |      |                             |                            |                            |
| 1                         | 156 | 17.3 | 0                           | 0                          | 0                          |
| 2                         | 155 | 29.7 | 115.4 (45.9, 184.8) 0.001   | 50.9 (-29.5, 131.4) 0.216  | 46.0 (-37.3, 129.3) 0.280  |
| ≥3                        | 123 | 26.8 | 189.6 (115.7, 263.4) <0.001 | 40.5 (-79.6, 160.6) 0.509  | 36.2 (-88.5, 160.9) 0.569  |
| P for trend               |     |      | <0.001                      | 0.440                      | 0.501                      |
| Diabetes                  |     |      |                             |                            |                            |
| No                        |     |      |                             |                            |                            |
| The number of             |     |      |                             |                            |                            |
| childbirths               |     |      |                             |                            |                            |
| 1                         | 371 | 27.0 | 0                           | 0                          | 0                          |
| 2                         | 228 | 24.1 | 133.0 (82.9, 183.1) <0.001  | 36.7 (-22.6, 96.0) 0.225   | 33.0 (-27.4, 93.3) 0.285   |
| ≥3                        | 126 | 24.6 | 247.5 (186.0, 308.9) <0.001 | 61.9 (-31.8, 155.7) 0.196  | 47.1 (-48.4, 142.6) 0.334  |
| P for trend               |     |      | <0.001                      | 0.175                      | 0.293                      |
| Total                     |     |      |                             |                            |                            |
| Continuous PWV (cm/s)     |     |      |                             |                            |                            |
| The number of childbirths |     |      |                             |                            |                            |
| 1                         | 527 | 24.1 | 0                           | 0                          | 0                          |

|             |     |      |                             |                           |                           |
|-------------|-----|------|-----------------------------|---------------------------|---------------------------|
| 2           | 383 | 26.4 | 128.0 (87.4, 168.6) <0.001  | 47.3 (0.2, 94.4) 0.049    | 46.3 (-1.6, 94.2) 0.058   |
| ≥3          | 249 | 25.7 | 222.8 (175.9, 269.6) <0.001 | 62.0 (-10.5, 134.5) 0.094 | 58.5 (-15.4, 132.5) 0.121 |
| P for trend |     |      | <0.001                      | 0.069                     | 0.088                     |

Non-adjusted model adjusted for nothing

Adjusted model I adjusted for age; BMI; SBP; DBP; TG; GGT; LDL-C; HDL-C; FBG; PBG; HbA1c ; baseline PWV; CHD history; hyperlipidemia history;

age at first gestation; age at menopause; number of pregnancies; smoking status; drinking status; antihypertensive drug use; hypoglycemic drug use

Adjusted model II adjusted for adjusted model I + TC; hypertensive disorder complicating pregnancy (HDCP); gestational diabetes mellitus (GDM)

**Table S5. Liner regression analysis between follow up PWV and the number of childbirths in hypertension history subgroups in Model I**

| Exposure                  | Hypertension Yes<br>B (95%CI) P-value | Hypertension No<br>B (95%CI) P-value | Total<br>B (95%CI) P-value |
|---------------------------|---------------------------------------|--------------------------------------|----------------------------|
| Age                       | 4.4 (-1.6, 10.3) 0.150                | 7.8 (0.5, 15.0) 0.037                | 5.4 (0.9, 9.9) 0.019       |
| BMI                       | -6.8 (-13.4, -0.2) 0.045              | -5.2 (-13.1, 2.8) 0.205              | -5.5 (-10.5, -0.5) 0.031   |
| SBP                       | 0.2 (-1.3, 1.7) 0.815                 | 0.4 (-2.3, 3.2) 0.771                | 0.2 (-1.1, 1.5) 0.741      |
| DBP                       | 0.0 (-1.3, 1.4) 0.985                 | 0.7 (-2.7, 4.1) 0.671                | 0.0 (-1.2, 1.2) 0.951      |
| TG                        | 16.4 (-12.2, 45.0) 0.260              | 3.2 (-28.0, 34.5) 0.839              | 11.4 (-9.5, 32.3) 0.286    |
| GGT                       | -0.9 (-2.1, 0.3) 0.128                | 0.3 (-1.2, 1.7) 0.723                | -0.5 (-1.4, 0.4) 0.266     |
| LDL_C                     | -13.2 (-38.4, 12.1) 0.306             | -9.4 (-37.2, 18.4) 0.508             | -9.0 (-27.7, 9.7) 0.344    |
| HDL_C                     | -15.4 (-85.6, 54.9) 0.668             | 9.4 (-64.3, 83.1) 0.804              | -10.0 (-60.5, 40.4) 0.697  |
| FBG                       | -0.8 (-23.9, 22.4) 0.949              | -10.9 (-34.5, 12.7) 0.366            | -7.7 (-23.9, 8.4) 0.350    |
| PBG                       | 3.5 (-4.2, 11.3) 0.372                | 9.0 (-1.1, 19.0) 0.081               | 5.9 (-0.2, 11.9) 0.057     |
| HbA1c                     | -5.1 (-45.1, 35.0) 0.805              | 13.3 (-27.7, 54.3) 0.526             | 0.1 (-27.9, 28.0) 0.996    |
| Baseline PWV              | 0.4 (0.3, 0.4) <0.001                 | 0.5 (0.4, 0.6) <0.001                | 0.4 (0.4, 0.5) <0.001      |
| The number of childbirths |                                       |                                      |                            |
| 1                         | 0                                     | 0                                    | 0                          |
| 2                         | 55.3 (-12.0, 122.7) 0.108             | 37.7 (-27.9, 103.4) 0.261            | 47.2 (0.0, 94.5) 0.050     |
| 3                         | 74.4 (-26.0, 174.7) 0.147             | 35.8 (-72.0, 143.7) 0.515            | 59.8 (-12.7, 132.3) 0.106  |
| CHD history               |                                       |                                      |                            |
| Yes                       | 0                                     | 0                                    | 0                          |
| No                        | -32.0 (-88.5, 24.5) 0.268             | -96.1 (-184.0, -8.1) 0.033           | -46.7 (-92.7, -0.6) 0.047  |
| hyperlipidemia history    |                                       |                                      |                            |
| Yes                       | 0                                     | 0                                    | 0                          |

|                               |                              |                             |                              |
|-------------------------------|------------------------------|-----------------------------|------------------------------|
| <b>No</b>                     | 28.2 (-19.4, 75.9) 0.246     | -22.2 (-75.1, 30.7) 0.411   | 3.8 (-31.2, 38.7) 0.833      |
| <b>age at first gestation</b> | -0.3 (-6.2, 5.6) 0.924       | 2.1 (-5.0, 9.1) 0.565       | -0.1 (-4.7, 4.4) 0.950       |
| <b>age at menopause</b>       | 0.5 (-1.9, 2.9) 0.683        | -0.6 (-2.9, 1.8) 0.628      | 0.0 (-1.7, 1.7) 0.991        |
| <b>number of pregnancies</b>  |                              |                             |                              |
| <b>0</b>                      | 0                            | 0                           | 0                            |
| <b>1</b>                      | 0                            | 0                           | 0                            |
| <b>2</b>                      | 18.0 (-60.8, 96.7) 0.655     | -23.6 (-93.5, 46.2) 0.507   | 0.3 (-52.6, 53.2) 0.991      |
| <b>3</b>                      | -1.7 (-84.0, 80.5) 0.967     | -33.6 (-108.5, 41.3) 0.380  | -17.6 (-73.2, 38.0) 0.536    |
| <b>4</b>                      | 4.1 (-90.4, 98.6) 0.932      | -87.3 (-177.8, 3.3) 0.060   | -32.2 (-97.7, 33.2) 0.334    |
| <b>5</b>                      | 14.2 (-98.4, 126.9) 0.804    | -1.7 (-146.6, 143.3) 0.982  | 9.0 (-76.5, 94.4) 0.837      |
| <b>6</b>                      | 2.8 (-188.6, 194.2) 0.977    | 102.6 (-147.7, 353.0) 0.422 | 11.6 (-136.1, 159.2) 0.878   |
| <b>8</b>                      | -320.4 (-634.3, -6.5) 0.046  | 0                           | -333.4 (-626.8, -40.0) 0.026 |
| <b>smoking status</b>         |                              |                             |                              |
| <b>No</b>                     | 0                            | 0                           | 0                            |
| <b>Occasional smokers</b>     | -106.8 (-328.1, 114.5) 0.345 | 114.5 (-97.6, 326.5) 0.291  | 5.6 (-146.6, 157.9) 0.942    |
| <b>Regular smokers</b>        | -97.5 (-295.2, 100.2) 0.334  | 5.4 (-121.9, 132.8) 0.933   | -23.2 (-132.3, 85.8) 0.677   |
| <b>drinking status</b>        |                              |                             |                              |
| <b>No</b>                     | 0                            | 0                           | 0                            |
| <b>Occasional drinkers</b>    | 23.3 (-69.9, 116.5) 0.625    | -70.3 (-145.8, 5.3) 0.069   | -26.3 (-85.8, 33.1) 0.385    |
| <b>Regular drinkers</b>       | -5.9 (-169.0, 157.2) 0.943   | 114.9 (-41.1, 270.9) 0.150  | 33.0 (-79.1, 145.0) 0.564    |
| <b>hypoglycemic drug</b>      |                              |                             |                              |
| <b>Yes</b>                    | 0                            | 0                           | 0                            |
| <b>No</b>                     | -13.6 (-79.6, 52.4) 0.686    | 79.9 (-23.1, 182.9) 0.129   | -1.9 (-56.0, 52.1) 0.944     |

Adjusted model I adjusted for age; BMI; SBP; DBP; TG; GGT; LDL-C; HDL-C; FBG; PBG; HbA1c; baseline PWV; CHD history; hyperlipidemia history; age at first gestation; age at menopause; number of pregnancies; smoking status; drinking status; antihypertensive drug use; hypoglycemic drug use



**Table S6. Liner regression analysis between follow up PWV and the number of childbirths in hypertension history subgroups in Model II**

| Exposure                         | Hypertension Yes<br>B (95%CI) <i>P</i> -value | Hypertension No<br>B (95%CI) <i>P</i> -value | Total<br>B (95%CI) <i>P</i> -value |
|----------------------------------|-----------------------------------------------|----------------------------------------------|------------------------------------|
| Age                              | 5.5 (-0.8, 11.9) 0.088                        | 6.3 (-1.6, 14.2) 0.120                       | 5.8 (0.9, 10.6) 0.020              |
| BMI                              | -7.9 (-14.8, -1.0) 0.026                      | -6.3 (-14.5, 1.9) 0.133                      | -5.9 (-11.1, -0.8) 0.025           |
| SBP                              | 0.4 (-1.2, 1.9) 0.643                         | 0.4 (-2.4, 3.2) 0.767                        | 0.3 (-1.0, 1.6) 0.610              |
| DBP                              | 0.0 (-1.4, 1.4) 0.994                         | 1.4 (-2.1, 4.9) 0.445                        | 0.0 (-1.2, 1.2) 0.977              |
| TG                               | -0.8 (-46.1, 44.4) 0.972                      | 25.4 (-31.3, 82.0) 0.381                     | 4.6 (-30.0, 39.2) 0.796            |
| GGT                              | -1.0 (-2.2, 0.2) 0.103                        | 0.3 (-1.1, 1.8) 0.652                        | -0.6 (-1.5, 0.3) 0.206             |
| LDL_C                            | -104.1 (-243.0, 34.8) 0.142                   | 80.1 (-99.2, 259.5) 0.382                    | -42.9 (-150.5, 64.6)<br>0.434      |
| HDL_C                            | -85.6 (-224.3, 53.0) 0.227                    | 82.7 (-91.1, 256.5) 0.352                    | -38.5 (-144.2, 67.2)<br>0.475      |
| FBG                              | 1.8 (-21.8, 25.3) 0.884                       | -8.8 (-32.9, 15.3) 0.474                     | -7.2 (-23.6, 9.1) 0.385            |
| PBG                              | 3.3 (-4.6, 11.2) 0.410                        | 8.2 (-2.0, 18.5) 0.115                       | 5.8 (-0.3, 12.0) 0.063             |
| HbA1c                            | -8.2 (-49.0, 32.5) 0.692                      | 14.2 (-28.5, 56.9) 0.515                     | -1.1 (-29.5, 27.3) 0.940           |
| Baseline PWV                     | 0.4 (0.3, 0.4) <0.001                         | 0.5 (0.4, 0.6) <0.001                        | 0.4 (0.4, 0.5) <0.001              |
| <b>The number of childbirths</b> |                                               |                                              |                                    |
| 1                                | 0                                             | 0                                            | 0                                  |
| 2                                | 54.1 (-14.4, 122.6) 0.122                     | 35.2 (-32.2, 102.5) 0.307                    | 45.4 (-2.5, 93.4) 0.064            |
| 3                                | 66.0 (-37.0, 169.0) 0.210                     | 27.6 (-82.6, 137.9) 0.623                    | 56.3 (-17.6, 130.2) 0.136          |
| <b>CHD history</b>               |                                               |                                              |                                    |
| Yes                              | 0                                             | 0                                            | 0                                  |
| No                               | -38.6 (-96.3, 19.0) 0.190                     | -110.0 (-201.7, -18.4) 0.019                 | -48.5 (-95.0, -1.9) 0.042          |
| <b>hyperlipidemia history</b>    |                                               |                                              |                                    |
| Yes                              | 0                                             | 0                                            | 0                                  |
| No                               | 38.4 (-10.9, 87.6) 0.127                      | -22.4 (-76.7, 32.0) 0.420                    | 4.3 (-31.6, 40.1) 0.815            |
| age at first gestation           | -0.6 (-6.6, 5.5) 0.853                        | 1.4 (-5.9, 8.8) 0.700                        | -0.1 (-4.7, 4.5) 0.972             |
| age at menopause                 | 0.5 (-2.0, 2.9) 0.702                         | -0.5 (-2.9, 1.8) 0.649                       | -0.0 (-1.7, 1.6) 0.955             |
| <b>number of pregnancies</b>     |                                               |                                              |                                    |
| 0                                | 0                                             | 0                                            | 0                                  |
| 1                                | 0                                             | 0                                            | 0                                  |
| 2                                | 19.5 (-60.9, 100.0) 0.634                     | -22.1 (-93.4, 49.1) 0.543                    | -0.2 (-53.9, 53.6) 0.995           |
| 3                                | 1.2 (-82.6, 85.0) 0.977                       | -38.4 (-115.4, 38.7) 0.330                   | -18.9 (-75.3, 37.5) 0.511          |
| 4                                | 11.7 (-84.9, 108.3) 0.813                     | -90.9 (-183.0, 1.1) 0.054                    | -32.3 (-98.6, 34.0) 0.340          |
| 5                                | 14.4 (-101.2, 130.0) 0.808                    | -1.1 (-148.2, 146.0) 0.989                   | 12.0 (-74.9, 98.9) 0.787           |
| 6                                | 11.7 (-182.9, 206.2) 0.906                    | 89.4 (-169.6, 348.4) 0.499                   | 19.6 (-130.1, 169.3)<br>0.798      |
| 8                                | -311.3 (-628.0, 5.4) 0.054                    | 0                                            | -329.0 (-624.4, -33.6)<br>0.029    |
| <b>smoking status</b>            |                                               |                                              |                                    |
| No                               | 0                                             | 0                                            | 0                                  |
| Occasional smokers               | -107.1 (-332.3, 118.1) 0.352                  | 86.0 (-130.0, 302.0) 0.436                   | 8.7 (-144.8, 162.3) 0.911          |

|                                                         |                              |                              |                                 |
|---------------------------------------------------------|------------------------------|------------------------------|---------------------------------|
| <b>Regular smokers</b>                                  | -90.9 (-290.3, 108.4) 0.372  | 9.5 (-124.9, 143.9) 0.890    | -17.2 (-128.8, 94.4)<br>0.763   |
| <b>drinking status</b>                                  |                              |                              |                                 |
| <b>No</b>                                               | 0                            | 0                            | 0                               |
| <b>Occasional drinkers</b>                              | 5.1 (-90.1, 100.4) 0.916     | -72.2 (-149.6, 5.1) 0.068    | -31.5 (-92.0, 29.0) 0.307       |
| <b>Regular drinkers</b>                                 | -11.4 (-176.2, 153.4) 0.892  | 125.2 (-43.5, 293.9) 0.146   | 20.6 (-93.5, 134.7) 0.724       |
| <b>antihypertensive drug use</b>                        |                              |                              |                                 |
| <b>Yes</b>                                              | 0                            | 0                            | 0                               |
| <b>No</b>                                               | -8.7 (-75.8, 58.3) 0.799     | 91.3 (-16.5, 199.2) 0.098    | 2.2 (-52.7, 57.2) 0.937         |
| <b>TC</b>                                               | 83.5 (-44.1, 211.1) 0.200    | -83.3 (-249.2, 82.6) 0.326   | 31.9 (-67.3, 131.1) 0.529       |
| <b>HDCP</b>                                             |                              |                              |                                 |
| <b>Yes</b>                                              | 0                            | 0                            | 0                               |
| <b>No</b>                                               | -19.4 (-93.9, 55.1) 0.610    | -65.9 (-187.4, 55.5) 0.288   | -31.7 (-93.1, 29.6) 0.311       |
| <b>GDM</b>                                              |                              |                              |                                 |
| <b>Yes</b>                                              | 0                            | 0                            | 0                               |
| <b>No</b>                                               | -45.5 (-578.2, 487.1) 0.867  | 248.1 (-110.5, 606.7) 0.176  | 82.0 (-215.6, 379.6)<br>0.589   |
| <b>occupation</b>                                       |                              |                              |                                 |
| <b>Worker</b>                                           | 0                            | 0                            | 0                               |
| <b>Famer</b>                                            | 129.5 (-404.0, 662.9) 0.635  | 0                            | 120.2 (-342.8, 583.2)<br>0.611  |
| <b>Cadre</b>                                            | 0                            | 8.3 (-696.0, 712.7) 0.981    | -0.6 (-619.9, 618.8)<br>0.999   |
| <b>Office and technical, personnel, doctor, teacher</b> | 239.0 (-227.9, 706.0) 0.316  | -86.4 (-669.3, 496.6) 0.772  | 122.5 (-285.4, 530.5)<br>0.556  |
| <b>Service worker</b>                                   | 0                            | 0                            | 0                               |
| <b>Housewife</b>                                        | -52.2 (-458.1, 353.7) 0.801  | 22.5 (-546.4, 591.5) 0.938   | -34.3 (-412.3, 343.6)<br>0.859  |
| <b>Unemployed</b>                                       | -33.5 (-413.5, 346.5) 0.863  | -123.2 (-632.9, 386.4) 0.636 | -36.5 (-395.2, 322.2)<br>0.842  |
| <b>Other</b>                                            | 68.8 (-381.6, 519.2) 0.765   | -93.1 (-673.2, 486.9) 0.753  | 22.1 (-379.7, 423.8)<br>0.914   |
| <b>Education</b>                                        |                              |                              |                                 |
| <b>Illiterate</b>                                       | 0                            | 0                            | 0                               |
| <b>Primary school</b>                                   | 64.8 (-58.8, 188.4) 0.304    | 127.6 (-36.5, 291.7) 0.128   | 75.1 (-20.2, 170.4) 0.123       |
| <b>Junior high school</b>                               | 73.9 (-48.0, 195.8) 0.235    | 64.2 (-93.1, 221.6) 0.424    | 60.8 (-32.5, 154.1) 0.202       |
| <b>Senior high school</b>                               | 53.1 (-74.4, 180.5) 0.415    | 90.3 (-69.2, 249.9) 0.268    | 55.4 (-40.8, 151.6) 0.259       |
| <b>College</b>                                          | 27.6 (-102.4, 157.6) 0.678   | 80.9 (-82.9, 244.7) 0.334    | 44.2 (-54.7, 143.2) 0.381       |
| <b>Marriage status</b>                                  |                              |                              |                                 |
| <b>Married</b>                                          | 0                            | 0                            | 0                               |
| <b>Widowed</b>                                          | 0                            | 0                            | 0                               |
| <b>Separated</b>                                        | -35.0 (-104.9, 34.9) 0.327   | 105.3 (14.9, 195.7) 0.023    | 10.6 (-43.3, 64.5) 0.700        |
| <b>Divorced</b>                                         | -327.2 (-871.4, 217.0) 0.239 | 0                            | -290.2 (-800.3, 219.9)<br>0.265 |

Adjusted model II adjusted for adjusted model I + TC; hypertensive disorder complicating pregnancy (HDCP); gestational diabetes mellitus (GDM)

**Table S7. Logistical regression analysis between change in PWV as a category variable in hypertension subgroups in Model II**

| Exposure                  | Hypertension yes<br>OR (95%CI) <i>P</i> -value | Hypertension No<br>OR (95%CI) <i>P</i> -value | Total<br>OR (95%CI) <i>P</i> -value |
|---------------------------|------------------------------------------------|-----------------------------------------------|-------------------------------------|
| Age                       | 1.0 (0.9, 1.1) 0.996                           | 1.0 (0.9, 1.1) 0.749                          | 1.0 (1.0, 1.0) 0.799                |
| BMI                       | 1.0 (0.9, 1.0) 0.280                           | 1.0 (0.9, 1.1) 0.814                          | 1.0 (0.9, 1.0) 0.637                |
| SBP                       | 1.0 (1.0, 1.0) 0.042                           | 1.0 (0.9, 1.0) 0.002                          | 1.0 (1.0, 1.0) 0.003                |
| DBP                       | 1.0 (1.0, 1.0) 0.319                           | 1.0 (1.0, 1.1) 0.115                          | 1.0 (1.0, 1.0) 0.235                |
| TG                        | 0.9 (0.6, 1.4) 0.670                           | 1.3 (0.7, 2.3) 0.371                          | 1.1 (0.8, 1.5) 0.692                |
| GGT                       | 1.0 (1.0, 1.0) 0.154                           | 1.0 (1.0, 1.0) 0.656                          | 1.0 (1.0, 1.0) 0.258                |
| LDL_C                     | 0.3 (0.1, 1.1) 0.076                           | 2.9 (0.5, 17.1) 0.248                         | 0.8 (0.3, 2.1) 0.632                |
| HDL_C                     | 0.4 (0.1, 1.3) 0.110                           | 3.0 (0.5, 17.0) 0.206                         | 0.9 (0.3, 2.2) 0.747                |
| FBG                       | 1.0 (0.8, 1.3) 0.915                           | 0.8 (0.6, 1.1) 0.221                          | 0.9 (0.8, 1.1) 0.231                |
| PBG                       | 1.0 (0.9, 1.1) 0.514                           | 1.1 (1.0, 1.2) 0.153                          | 1.0 (0.9, 1.1) 0.824                |
| HbA1c                     | 0.9 (0.6, 1.3) 0.500                           | 1.1 (0.7, 1.7) 0.570                          | 1.0 (0.8, 1.3) 0.966                |
| The number of childbirths |                                                |                                               |                                     |
| 1                         | 1.0                                            | 1.0                                           | 1.0                                 |
| 2                         | 1.9 (1.0, 3.7) 0.052                           | 1.1 (0.6, 2.1) 0.800                          | 1.4 (0.9, 2.2) 0.124                |
| 3                         | 1.7 (0.6, 4.4) 0.305                           | 1.3 (0.4, 3.8) 0.690                          | 1.6 (0.8, 3.1) 0.195                |
| CHD history               |                                                |                                               |                                     |
| Yes                       | 1.0                                            | 1.0                                           | 1.0                                 |
| No                        | 0.8 (0.5, 1.4) 0.507                           | 0.6 (0.2, 1.4) 0.246                          | 0.9 (0.6, 1.3) 0.504                |
| hyperlipidemia history    |                                                |                                               |                                     |
| Yes                       | 1.0                                            | 1.0                                           | 1.0                                 |
| No                        | 1.0 (0.6, 1.6) 0.966                           | 0.6 (0.4, 1.1) 0.079                          | 0.8 (0.6, 1.2) 0.275                |
| age at first gestation    | 1.0 (1.0, 1.1) 0.654                           | 1.0 (0.9, 1.1) 0.614                          | 1.0 (1.0, 1.1) 0.430                |
| age at menopause          | 1.0 (1.0, 1.0) 0.762                           | 1.0 (1.0, 1.0) 0.560                          | 1.0 (1.0, 1.0) 0.952                |
| number of pregnancies     |                                                |                                               |                                     |
| 0                         | 1.0                                            | 1.0                                           | 1.0                                 |
| 1                         | 1.0                                            | 1.0                                           | 1.0                                 |
| 2                         | 0.7 (0.3, 1.6) 0.405                           | 0.9 (0.5, 1.9) 0.839                          | 0.8 (0.5, 1.4) 0.503                |
| 3                         | 0.6 (0.3, 1.4) 0.257                           | 0.9 (0.4, 1.9) 0.786                          | 0.7 (0.4, 1.3) 0.277                |
| 4                         | 0.7 (0.3, 1.9) 0.521                           | 0.5 (0.2, 1.3) 0.152                          | 0.6 (0.3, 1.2) 0.173                |
| 5                         | 1.1 (0.4, 3.2) 0.834                           | 1.3 (0.3, 5.5) 0.727                          | 1.1 (0.5, 2.5) 0.735                |
| 6                         | 1.9 (0.4, 10.0) 0.433                          | 2.8 (0.2, 33.8) 0.421                         | 2.0 (0.6, 7.2) 0.269                |
| 8                         | 0.0 (0.0, Inf) 0.985                           | 1.0                                           | 0.0 (0.0, Inf) 0.978                |
| smoking status            |                                                |                                               |                                     |
| No                        | 1.0                                            | 1.0                                           | 1.0                                 |
| Occasional smokers        | 1.1 (0.2, 7.1) 0.927                           | 0.8 (0.1, 6.8) 0.838                          | 1.5 (0.4, 5.4) 0.552                |
| Regular smokers           | 0.6 (0.1, 5.5) 0.650                           | 1.4 (0.4, 5.2) 0.641                          | 1.0 (0.4, 2.8) 0.994                |
| drinking status           |                                                |                                               |                                     |
| No                        | 1.0                                            | 1.0                                           | 1.0                                 |
| Occasional drinkers       | 1.6 (0.7, 3.7) 0.258                           | 0.7 (0.3, 1.7) 0.442                          | 1.0 (0.6, 1.8) 0.882                |
| Regular drinkers          | 0.5 (0.1, 2.9) 0.447                           | 1.0 (0.2, 6.0) 0.966                          | 0.9 (0.3, 2.6) 0.788                |

|                                                     |                            |                       |                           |
|-----------------------------------------------------|----------------------------|-----------------------|---------------------------|
| <b>hypoglycemic drug use</b>                        |                            |                       |                           |
| Yes                                                 | 1.0                        | 1.0                   | 1.0                       |
| No                                                  | 0.6 (0.3, 1.2) 0.167       | 0.9 (0.3, 2.7) 0.913  | 0.7 (0.4, 1.2) 0.261      |
| TC                                                  | 2.4 (0.8, 7.2) 0.105       | 0.3 (0.1, 1.8) 0.211  | 1.2 (0.5, 2.8) 0.758      |
| <b>HDCP</b>                                         |                            |                       |                           |
| Yes                                                 | 1.0                        | 1.0                   | 1.0                       |
| No                                                  | 0.8 (0.4, 1.6) 0.601       | 0.6 (0.2, 1.9) 0.387  | 0.8 (0.5, 1.4) 0.476      |
| <b>GDM</b>                                          |                            |                       |                           |
| Yes                                                 | 1.0                        | 1.0                   | 1.0                       |
| No                                                  | 1953436.6 (0.0, Inf) 0.992 | 0.6 (0.0, 15.4) 0.758 | 0.8 (0.1, 10.7) 0.893     |
| <b>occupation</b>                                   |                            |                       |                           |
| Worker                                              | 1.0                        | 1.0                   | 1.0                       |
| Famer                                               | 0.3 (0.0, 21.8) 0.608      | 1.0                   | 0.7 (0.0, 36.5) 0.880     |
| Cadre                                               | 1.0                        | 0.2 (0.0, Inf) 0.999  | 536376.7 (0.0, Inf) 0.988 |
| Office and technical,<br>personnel, doctor, teacher | 0.6 (0.0, 24.1) 0.790      | 0.0 (0.0, Inf) 0.985  | 0.3 (0.0, 8.1) 0.448      |
| Service worker                                      | 1.0                        | 1.0                   | 1.0                       |
| Housewife                                           | 0.1 (0.0, 3.6) 0.231       | 0.0 (0.0, Inf) 0.986  | 0.1 (0.0, 3.2) 0.209      |
| Unemployed                                          | 0.1 (0.0, 2.5) 0.175       | 0.0 (0.0, Inf) 0.985  | 0.1 (0.0, 2.4) 0.168      |
| Other                                               | 0.1 (0.0, 3.2) 0.174       | 0.0 (0.0, Inf) 0.986  | 0.1 (0.0, 3.0) 0.182      |
| <b>Education</b>                                    |                            |                       |                           |
| Illiterate                                          | 1.0                        | 1.0                   | 1.0                       |
| Primary school                                      | 1.2 (0.4, 3.7) 0.733       | 2.8 (0.3, 23.6) 0.339 | 1.6 (0.6, 4.0) 0.348      |
| Junior high school                                  | 0.7 (0.2, 2.3) 0.593       | 2.9 (0.4, 22.9) 0.310 | 1.1 (0.4, 2.8) 0.821      |
| Senior high school                                  | 0.7 (0.2, 2.2) 0.508       | 5.0 (0.6, 40.4) 0.129 | 1.4 (0.5, 3.6) 0.485      |
| College                                             | 0.6 (0.2, 1.9) 0.350       | 4.1 (0.5, 34.3) 0.191 | 1.2 (0.4, 3.1) 0.754      |
| <b>Marriage status</b>                              |                            |                       |                           |
| Married                                             | 1.0                        | 1.0                   | 1.0                       |
| Widowed                                             | 1.0                        | 1.0                   | 1.0                       |
| Separated                                           | 0.6 (0.3, 1.2) 0.121       | 3.0 (1.2, 7.1) 0.014  | 1.1 (0.6, 1.8) 0.779      |
| Divorced                                            | 0.0 (0.0, Inf) 0.991       | 1.0                   | 0.0 (0.0, Inf) 0.987      |

Adjusted model II adjusted for adjusted model I + TC; hypertensive disorder complicating pregnancy (HDCP); gestational diabetes mellitus (GDM)

**Table S8. Logistical regression analysis between change in PWV as a category variable in hypertension subgroups in Model I**

| Exposure               | Hypertension Yes<br>OR (95%CI) <i>P</i> -value | Hypertension No<br>OR (95%CI) <i>P</i> -value | Total<br>OR (95%CI) <i>P</i> -value |
|------------------------|------------------------------------------------|-----------------------------------------------|-------------------------------------|
| Age                    | 1.0 (1.0, 1.1) 0.889                           | 1.0 (0.9, 1.1) 0.791                          | 1.0 (1.0, 1.0) 0.859                |
| BMI                    | 1.0 (0.9, 1.0) 0.489                           | 1.0 (0.9, 1.1) 0.694                          | 1.0 (0.9, 1.0) 0.707                |
| SBP                    | 1.0 (1.0, 1.0) 0.050                           | 1.0 (0.9, 1.0) 0.002                          | 1.0 (1.0, 1.0) 0.003                |
| DBP                    | 1.0 (1.0, 1.0) 0.327                           | 1.0 (1.0, 1.1) 0.161                          | 1.0 (1.0, 1.0) 0.260                |
| TG                     | 1.1 (0.9, 1.4) 0.444                           | 1.0 (0.7, 1.3) 0.986                          | 1.1 (0.9, 1.3) 0.379                |
| GGT                    | 1.0 (1.0, 1.0) 0.191                           | 1.0 (1.0, 1.0) 0.814                          | 1.0 (1.0, 1.0) 0.298                |
| LDL_C                  | 0.9 (0.7, 1.1) 0.308                           | 0.9 (0.7, 1.2) 0.565                          | 0.9 (0.8, 1.1) 0.300                |
| HDL_C                  | 0.8 (0.4, 1.5) 0.420                           | 1.2 (0.6, 2.5) 0.588                          | 1.0 (0.6, 1.6) 0.883                |
| FBG                    | 1.0 (0.8, 1.2) 0.761                           | 0.9 (0.7, 1.1) 0.299                          | 0.9 (0.8, 1.1) 0.237                |
| PBG                    | 1.0 (0.9, 1.1) 0.666                           | 1.1 (1.0, 1.2) 0.251                          | 1.0 (1.0, 1.1) 0.791                |
| HbA1c                  | 0.9 (0.6, 1.3) 0.624                           | 1.1 (0.7, 1.6) 0.599                          | 1.0 (0.8, 1.3) 0.933                |
| The number of          |                                                |                                               |                                     |
| childbirths            |                                                |                                               |                                     |
| 1                      | 1.0                                            | 1.0                                           | 1.0                                 |
| 2                      | 1.8 (1.0, 3.5) 0.060                           | 1.1 (0.6, 2.2) 0.698                          | 1.4 (0.9, 2.2) 0.107                |
| 3                      | 1.9 (0.7, 4.8) 0.197                           | 1.3 (0.4, 3.9) 0.613                          | 1.6 (0.8, 3.1) 0.189                |
| CHD history            |                                                |                                               |                                     |
| Yes                    | 1.0                                            | 1.0                                           | 1.0                                 |
| No                     | 0.9 (0.5, 1.5) 0.661                           | 0.6 (0.3, 1.4) 0.256                          | 0.9 (0.6, 1.3) 0.522                |
| hyperlipidemia history |                                                |                                               |                                     |
| Yes                    | 1.0                                            | 1.0                                           | 1.0                                 |
| No                     | 1.0 (0.6, 1.6) 0.990                           | 0.6 (0.4, 1.0) 0.070                          | 0.8 (0.6, 1.1) 0.260                |
| age at first gestation | 1.0 (1.0, 1.1) 0.713                           | 1.0 (1.0, 1.1) 0.411                          | 1.0 (1.0, 1.1) 0.437                |
| age at menopause       | 1.0 (1.0, 1.0) 0.889                           | 1.0 (1.0, 1.0) 0.724                          | 1.0 (1.0, 1.0) 0.958                |
| number of pregnancies  |                                                |                                               |                                     |
| 0                      | 1.0                                            | 1.0                                           | 1.0                                 |
| 1                      | 1.0                                            | 1.0                                           | 1.0                                 |
| 2                      | 0.8 (0.4, 1.7) 0.563                           | 0.9 (0.5, 1.7) 0.737                          | 0.9 (0.5, 1.4) 0.515                |
| 3                      | 0.7 (0.3, 1.5) 0.348                           | 0.9 (0.5, 1.9) 0.851                          | 0.8 (0.5, 1.3) 0.343                |
| 4                      | 0.8 (0.3, 1.9) 0.579                           | 0.5 (0.2, 1.3) 0.141                          | 0.7 (0.4, 1.2) 0.200                |
| 5                      | 1.2 (0.4, 3.2) 0.785                           | 1.1 (0.3, 4.4) 0.911                          | 1.1 (0.5, 2.4) 0.771                |
| 6                      | 1.7 (0.3, 8.4) 0.508                           | 2.6 (0.3, 24.5) 0.404                         | 1.9 (0.6, 6.6) 0.305                |
| 8                      | 0.0 (0.0, Inf) 0.978                           | 1.0                                           | 0.0 (0.0, Inf) 0.978                |
| smoking status         |                                                |                                               |                                     |
| No                     | 1.0                                            | 1.0                                           | 1.0                                 |
| Occasional smokers     | 1.3 (0.2, 7.7) 0.805                           | 1.0 (0.1, 7.2) 0.969                          | 1.4 (0.4, 5.0) 0.611                |
| Regular smokers        | 0.6 (0.1, 5.0) 0.605                           | 1.4 (0.4, 4.8) 0.600                          | 1.0 (0.4, 2.7) 0.952                |
| drinking status        |                                                |                                               |                                     |
| No                     | 1.0                                            | 1.0                                           | 1.0                                 |
| Occasional drinkers    | 1.6 (0.7, 3.7) 0.229                           | 0.8 (0.3, 1.6) 0.476                          | 1.0 (0.6, 1.8) 0.889                |

|                              |                      |                      |                      |
|------------------------------|----------------------|----------------------|----------------------|
| <b>Regular drinkers</b>      | 0.6 (0.1, 3.4) 0.603 | 1.2 (0.3, 5.0) 0.847 | 1.0 (0.3, 2.8) 0.930 |
| <b>hypoglycemic drug use</b> |                      |                      |                      |
| <b>Yes</b>                   | 1.0                  | 1.0                  | 1.0                  |
| <b>No</b>                    | 0.6 (0.3, 1.2) 0.144 | 1.0 (0.4, 2.6) 0.929 | 0.7 (0.4, 1.2) 0.179 |

Adjusted model I adjusted for age; BMI; SBP; DBP; TG; GGT; LDL-C; HDL-C; FBG; PBG; HbA1c; CHD history; hyperlipidemia history; age at first gestation; age at menopause; number of pregnancies; smoking status; drinking status; antihypertensive drug use; hypoglycemic drug use

**Table S9. Liner regression analysis between change in PWV as a continuous variable in hypertension subgroups in Model I**

| Exposure                  | Hypertension Yes<br>B (95%CI) <i>P</i> -value | Hypertension No<br>B (95%CI) <i>P</i> -value | Total<br>B (95%CI) <i>P</i> -value |
|---------------------------|-----------------------------------------------|----------------------------------------------|------------------------------------|
| Age                       | -9.2 (-16.7, -1.8) 0.015                      | -2.6 (-10.5, 5.2) 0.512                      | -7.4 (-12.7, -2.0) 0.007           |
| BMI                       | -0.1 (-8.5, 8.4) 0.987                        | -1.3 (-10.2, 7.6) 0.771                      | 0.2 (-5.9, 6.3) 0.953              |
| SBP                       | -4.1 (-5.9, -2.2) <0.001                      | -4.3 (-7.2, -1.4) 0.004                      | -4.1 (-5.6, -2.6) <0.001           |
| DBP                       | 1.3 (-0.5, 3.0) 0.149                         | 1.7 (-2.1, 5.5) 0.389                        | 1.3 (-0.2, 2.7) 0.086              |
| TG                        | 3.8 (-32.9, 40.4) 0.841                       | -6.0 (-40.9, 29.0) 0.739                     | 3.8 (-21.8, 29.4) 0.771            |
| GGT                       | -0.8 (-2.4, 0.7) 0.291                        | 0.6 (-1.0, 2.2) 0.455                        | -0.4 (-1.5, 0.7) 0.467             |
| LDL_C                     | -10.3 (-42.7, 22.1) 0.535                     | -10.8 (-42.0, 20.4) 0.499                    | -8.3 (-31.1, 14.6) 0.480           |
| HDL_C                     | -17.2 (-107.4, 72.9) 0.708                    | 11.1 (-71.5, 93.8) 0.792                     | -4.3 (-66.0, 57.5) 0.893           |
| FBG                       | 1.3 (-28.5, 31.0) 0.934                       | -13.3 (-39.7, 13.1) 0.325                    | -8.9 (-28.7, 10.9) 0.379           |
| PBG                       | 1.5 (-8.5, 11.4) 0.772                        | 9.0 (-2.3, 20.2) 0.119                       | 4.1 (-3.3, 11.5) 0.278             |
| HbA1c                     | -36.7 (-87.9, 14.6) 0.161                     | 12.9 (-33.1, 58.9) 0.582                     | -17.5 (-51.7, 16.7) 0.316          |
| The number of childbirths |                                               |                                              |                                    |
| 1                         | 0                                             | 0                                            | 0                                  |
| 2                         | 71.2 (-15.2, 157.6) 0.107                     | 36.1 (-37.6, 109.7) 0.337                    | 52.5 (-5.3, 110.3) 0.076           |
| 3                         | 102.8 (-26.0, 231.5) 0.118                    | 47.5 (-73.4, 168.4) 0.441                    | 81.7 (-7.0, 170.5) 0.071           |
| CHD history               |                                               |                                              |                                    |
| Yes                       | 0                                             | 0                                            | 0                                  |
| No                        | -60.0 (-132.5, 12.5) 0.105                    | -94.6 (-193.2, 4.0) 0.061                    | -60.3 (-116.7, -3.9) 0.036         |
| hyperlipidemia history    |                                               |                                              |                                    |
| Yes                       | 0                                             | 0                                            | 0                                  |
| No                        | 3.3 (-57.8, 64.3) 0.917                       | -23.8 (-83.1, 35.5) 0.432                    | -9.3 (-52.1, 33.5) 0.669           |
| age at first gestation    | -0.4 (-8.0, 7.2) 0.921                        | 2.2 (-5.7, 10.1) 0.586                       | -0.1 (-5.6, 5.4) 0.966             |
| age at menopause          | -0.5 (-3.6, 2.6) 0.737                        | -0.4 (-3.1, 2.2) 0.737                       | -0.4 (-2.5, 1.6) 0.695             |
| number of pregnancies     |                                               |                                              |                                    |
| 0                         | 0                                             | 0                                            | 0                                  |
| 1                         | 0                                             | 0                                            | 0                                  |
| 2                         | 11.0 (-90.1, 112.0) 0.832                     | -23.0 (-101.3, 55.3) 0.565                   | -0.7 (-65.5, 64.1) 0.984           |
| 3                         | -35.2 (-140.7, 70.3) 0.513                    | -29.7 (-113.7, 54.3) 0.489                   | -33.0 (-101.0, 35.0) 0.342         |
| 4                         | 20.8 (-100.5, 142.1) 0.737                    | -57.6 (-158.9, 43.6) 0.265                   | -5.1 (-85.2, 74.9) 0.900           |
| 5                         | 49.8 (-94.7, 194.3) 0.500                     | -50.3 (-212.5, 111.9) 0.544                  | 16.4 (-88.2, 121.0) 0.758          |
| 6                         | -59.1 (-304.6, 186.4) 0.637                   | 167.8 (-112.5, 448.0) 0.241                  | -8.5 (-189.3, 172.3) 0.927         |
| 8                         | -263.1 (-666.0, 139.7) 0.201                  | 0                                            | -252.4 (-611.5, 106.8) 0.169       |
| smoking status            |                                               |                                              |                                    |
| No                        | 0                                             | 0                                            | 0                                  |
| Occasional smokers        | 40.8 (-242.6, 324.2) 0.778                    | 126.8 (-110.9, 364.5) 0.296                  | 90.6 (-95.6, 276.8) 0.341          |
| Regular smokers           | 37.8 (-215.4, 291.0) 0.770                    | -0.5 (-143.2, 142.3) 0.995                   | 17.5 (-116.0, 150.9) 0.797         |
| drinking status           |                                               |                                              |                                    |
| No                        | 0                                             | 0                                            | 0                                  |
| Occasional drinkers       | 61.7 (-57.9, 181.2) 0.312                     | -58.2 (-142.8, 26.5) 0.179                   | -6.8 (-79.5, 66.0) 0.855           |



|                              |                             |                            |                            |
|------------------------------|-----------------------------|----------------------------|----------------------------|
| <b>Regular drinkers</b>      | -65.2 (-274.4, 144.1) 0.542 | 116.2 (-58.7, 291.2) 0.194 | 14.9 (-122.2, 152.1) 0.831 |
| <b>hypoglycemic drug use</b> |                             |                            |                            |
| <b>Yes</b>                   | 0                           | 0                          | 0                          |
| <b>No</b>                    | -74.8 (-159.1, 9.5) 0.083   | 146.1 (31.5, 260.7) 0.013  | -22.6 (-88.7, 43.6) 0.503  |

Adjusted model I adjusted for age; BMI; SBP; DBP; TG; GGT; LDL-C; HDL-C; FBG; PBG; HbA1c; CHD history; hyperlipidemia history; age at first gestation; age at menopause; number of pregnancies; smoking status; drinking status; antihypertensive drug use; hypoglycemic drug use

**Table S10. Liner regression analysis between change in PWV as a continuous variable in hypertension subgroups in Model II**

| Exposure                  | Hypertension Yes<br>B (95%CI) <i>P</i> -value | Hypertension No<br>B (95%CI) <i>P</i> -value | Total<br>B (95%CI) <i>P</i> -value |
|---------------------------|-----------------------------------------------|----------------------------------------------|------------------------------------|
| Age                       | -9.8 (-17.7, -1.8) 0.016                      | -4.5 (-13.0, 4.0) 0.301                      | -8.2 (-13.9, -2.5) 0.005           |
| BMI                       | -1.6 (-10.5, 7.3) 0.722                       | -2.3 (-11.4, 6.9) 0.628                      | -0.4 (-6.7, 5.9) 0.904             |
| SBP                       | -4.1 (-6.0, -2.3) <0.001                      | -4.0 (-7.0, -1.1) 0.008                      | -4.1 (-5.6, -2.6) <0.001           |
| DBP                       | 1.4 (-0.4, 3.2) 0.127                         | 1.9 (-2.0, 5.8) 0.338                        | 1.3 (-0.2, 2.8) 0.080              |
| TG                        | -6.5 (-64.9, 51.8) 0.826                      | 23.2 (-40.0, 86.5) 0.472                     | 4.5 (-38.0, 46.9) 0.837            |
| GGT                       | -0.8 (-2.4, 0.7) 0.289                        | 0.7 (-1.0, 2.3) 0.423                        | -0.4 (-1.6, 0.7) 0.445             |
| LDL_C                     | -82.8 (-261.9, 96.4) 0.366                    | 120.4 (-79.6, 320.4) 0.239                   | -15.8 (-147.8, 116.1) 0.814        |
| HDL_C                     | -75.8 (-254.7, 103.1) 0.407                   | 119.5 (-74.4, 313.4) 0.228                   | -10.4 (-140.1, 119.2) 0.875        |
| FBG                       | 2.5 (-27.8, 32.8) 0.872                       | -11.1 (-38.0, 15.8) 0.419                    | -9.0 (-29.0, 11.0) 0.380           |
| PBG                       | 2.0 (-8.2, 12.2) 0.699                        | 8.3 (-3.2, 19.7) 0.157                       | 4.3 (-3.2, 11.9) 0.259             |
| HbA1c                     | -43.6 (-96.0, 8.8) 0.103                      | 17.0 (-30.6, 64.7) 0.484                     | -19.4 (-54.2, 15.3) 0.273          |
| The number of childbirths |                                               |                                              |                                    |
| 1                         | 0                                             | 0                                            | 0                                  |
| 2                         | 77.0 (-11.3, 165.4) 0.088                     | 35.8 (-39.4, 110.9) 0.352                    | 55.0 (-3.9, 113.8) 0.067           |
| 3                         | 96.2 (-36.6, 229.1) 0.156                     | 46.8 (-76.3, 169.8) 0.457                    | 83.5 (-7.1, 174.1) 0.071           |
| CHD history               |                                               |                                              |                                    |
| Yes                       | 0                                             | 0                                            | 0                                  |
| No                        | -70.7 (-144.9, 3.6) 0.063                     | -98.2 (-200.5, 4.1) 0.061                    | -64.3 (-121.5, -7.2) 0.028         |
| hyperlipidemia history    |                                               |                                              |                                    |
| Yes                       | 0                                             | 0                                            | 0                                  |
| No                        | 9.7 (-53.7, 73.2) 0.764                       | -24.6 (-85.2, 36.1) 0.427                    | -10.6 (-54.5, 33.3) 0.636          |
| age at first gestation    | -0.0 (-7.8, 7.8) 1.000                        | 0.9 (-7.3, 9.1) 0.826                        | 0.4 (-5.3, 6.0) 0.895              |
| age at menopause          | -0.4 (-3.5, 2.8) 0.808                        | -0.4 (-3.1, 2.2) 0.756                       | -0.4 (-2.5, 1.6) 0.678             |
| number of pregnancies     |                                               |                                              |                                    |
| 0                         | 0                                             | 0                                            | 0                                  |
| 1                         | 0                                             | 0                                            | 0                                  |
| 2                         | 17.0 (-86.8, 120.7) 0.749                     | -19.2 (-98.7, 60.4) 0.637                    | 2.2 (-63.7, 68.2) 0.947            |
| 3                         | -33.8 (-141.9, 74.3) 0.540                    | -31.4 (-117.4, 54.7) 0.475                   | -32.1 (-101.3, 37.1) 0.363         |
| 4                         | 23.7 (-100.9, 148.3) 0.709                    | -60.9 (-163.4, 41.7) 0.246                   | -6.2 (-87.5, 75.1) 0.882           |
| 5                         | 52.0 (-97.0, 201.1) 0.494                     | -36.8 (-200.9, 127.2) 0.660                  | 21.2 (-85.3, 127.8) 0.696          |
| 6                         | -57.6 (-308.4, 193.3) 0.653                   | 171.1 (-117.5, 459.6) 0.246                  | -7.1 (-190.8, 176.5) 0.939         |
| 8                         | -277.4 (-685.9, 131.1) 0.184                  | 0                                            | -261.0 (-623.3, 101.4) 0.158       |
| smoking status            |                                               |                                              |                                    |
| No                        | 0                                             | 0                                            | 0                                  |
| Occasional smokers        | 31.6 (-258.4, 321.6) 0.831                    | 99.3 (-141.9, 340.4) 0.420                   | 91.0 (-97.2, 279.2) 0.344          |
| Regular smokers           | 16.3 (-240.5, 273.2) 0.901                    | 22.7 (-127.3, 172.7) 0.767                   | 24.3 (-112.6, 161.1) 0.728         |
| drinking status           |                                               |                                              |                                    |
| No                        | 0                                             | 0                                            | 0                                  |
| Occasional drinkers       | 49.6 (-73.2, 172.3) 0.429                     | -57.6 (-143.9, 28.7) 0.192                   | -5.7 (-79.9, 68.4) 0.879           |
| Regular drinkers          | -67.1 (-279.6, 145.4) 0.536                   | 108.6 (-79.8, 296.9) 0.259                   | 1.6 (-138.4, 141.6) 0.982          |

| hypoglycemic drug use                                  |                              |                              |                              |
|--------------------------------------------------------|------------------------------|------------------------------|------------------------------|
| Yes                                                    | 0                            | 0                            | 0                            |
| No                                                     | -79.9 (-165.9, 6.1) 0.069    | 165.7 (46.5, 285.0) 0.007    | -19.6 (-87.0, 47.8) 0.569    |
| TC                                                     | 64.1 (-100.4, 228.7) 0.445   | -122.9 (-307.9, 62.1) 0.194  | 6.4 (-115.2, 128.0) 0.918    |
| HDCP                                                   |                              |                              |                              |
| Yes                                                    | 0                            | 0                            | 0                            |
| No                                                     | 70.6 (-24.8, 166.1) 0.147    | -33.4 (-168.8, 102.0) 0.629  | 37.0 (-37.9, 112.0) 0.333    |
| GDM                                                    |                              |                              |                              |
| Yes                                                    | 0                            | 0                            | 0                            |
| No                                                     | -213.8 (-900.6, 473.1) 0.542 | 327.8 (-72.2, 727.8) 0.109   | 57.4 (-307.7, 422.5) 0.758   |
| occupation                                             |                              |                              |                              |
| Worker                                                 | 0                            | 0                            | 0                            |
| Famer                                                  | -1.3 (-689.3, 686.7) 0.997   | 0                            | 111.6 (-456.4, 679.6) 0.700  |
| Cadre                                                  | 0                            | -47.2 (-833.4, 739.0) 0.906  | 78.2 (-681.6, 838.1) 0.840   |
| Office and technical,<br>personnel, doctor,<br>teacher | 148.7 (-453.7, 751.0) 0.629  | -321.6 (-970.3, 327.1) 0.332 | 34.1 (-466.3, 534.5) 0.894   |
| Service worker                                         | 0                            | 0                            | 0                            |
| Housewife                                              | -179.7 (-703.1, 343.7) 0.501 | -244.7 (-877.1, 387.7) 0.449 | -147.3 (-610.9, 316.3) 0.534 |
| Unemployed                                             | -106.2 (-596.4, 384.0) 0.671 | -322.5 (-889.8, 244.8) 0.266 | -86.1 (-526.2, 354.0) 0.701  |
| Other                                                  | -227.8 (-807.7, 352.0) 0.442 | -214.0 (-861.0, 433.0) 0.517 | -118.4 (-611.1, 374.3) 0.638 |
| Education                                              |                              |                              |                              |
| Illiterate                                             | 0                            | 0                            | 0                            |
| Primary school                                         | -0.1 (-159.3, 159.1) 0.999   | 165.9 (-17.1, 349.0) 0.076   | 39.8 (-77.1, 156.6) 0.505    |
| Junior high school                                     | -19.6 (-176.4, 137.3) 0.807  | 102.9 (-72.5, 278.4) 0.251   | 10.7 (-103.6, 125.0) 0.855   |
| Senior high school                                     | -58.3 (-222.0, 105.5) 0.486  | 134.0 (-43.9, 311.8) 0.141   | 0.8 (-117.1, 118.8) 0.989    |
| College                                                | -58.8 (-226.2, 108.6) 0.491  | 139.2 (-43.2, 321.7) 0.136   | 1.6 (-119.8, 122.9) 0.980    |
| Marriage status                                        |                              |                              |                              |
| Married                                                | 0                            | 0                            | 0                            |
| Widowed                                                | 0                            | 0                            | 0                            |
| Separated                                              | -20.0 (-110.1, 70.2) 0.665   | 113.7 (12.9, 214.6) 0.028    | 23.7 (-42.4, 89.9) 0.482     |
| Divorced                                               | -294.6 (-996.7, 407.4) 0.411 | 0                            | -253.7 (-879.5, 372.1) 0.427 |

Adjusted model II adjusted for adjusted model I + TC; hypertensive disorder complicating pregnancy (HDCP); gestational diabetes mellitus (GDM)

**Table S11. Liner regression analysis between follow up PWV and the number of childbirths in diabetes history subgroups in Model I**

| Exposure | Diabetes Yes              | Diabetes No               | Total                     |
|----------|---------------------------|---------------------------|---------------------------|
|          | B (95%CI) <i>P</i> -value | B (95%CI) <i>P</i> -value | B (95%CI) <i>P</i> -value |
| Age      | 9.0 (2.0, 16.1) 0.013     | 2.8 (-3.3, 8.9) 0.365     | 5.7 (1.2, 10.2) 0.013     |
| BMI      | -7.1 (-15.6, 1.4) 0.102   | -4.6 (-10.9, 1.7) 0.150   | -5.2 (-10.2, -0.3) 0.038  |
| SBP      | -0.5 (-2.3, 1.2) 0.540    | 1.4 (-0.3, 3.0) 0.099     | 0.3 (-0.8, 1.5) 0.560     |
| DBP      | 0.4 (-1.1, 1.8) 0.611     | -0.8 (-3.5, 2.0) 0.593    | 0.1 (-1.1, 1.3) 0.887     |
| TG       | -8.4 (-42.6, 25.7) 0.629  | 21.0 (-6.2, 48.1) 0.130   | 10.3 (-10.5, 31.2) 0.331  |
| GGT      | -1.1 (-2.7, 0.5) 0.168    | 0.1 (-1.1, 1.2) 0.907     | -0.5 (-1.4, 0.4) 0.273    |

|                                  |                              |                             |                              |
|----------------------------------|------------------------------|-----------------------------|------------------------------|
| <b>LDL_C</b>                     | -6.5 (-36.4, 23.4) 0.671     | -8.0 (-32.3, 16.2) 0.517    | -9.6 (-28.2, 9.0) 0.313      |
| <b>HDL_C</b>                     | -6.1 (-94.6, 82.4) 0.893     | -3.6 (-66.6, 59.5) 0.912    | -12.6 (-63.0, 37.7) 0.623    |
| <b>FBG</b>                       | -10.1 (-28.9, 8.7) 0.295     | -3.8 (-48.5, 40.9) 0.868    | -7.6 (-23.8, 8.6) 0.358      |
| <b>PBG</b>                       | 6.4 (-1.5, 14.3) 0.113       | 11.5 (-1.8, 24.9) 0.091     | 7.4 (0.9, 13.9) 0.025        |
| <b>HbA1c</b>                     | 17.7 (-15.4, 50.8) 0.296     | -52.1 (-118.6, 14.4) 0.125  | 3.7 (-24.6, 32.1) 0.796      |
| <b>Baseline PWV</b>              | 0.3 (0.3, 0.4) <0.001        | 0.5 (0.4, 0.5) <0.001       | 0.4 (0.4, 0.5) <0.001        |
| <b>The number of childbirths</b> |                              |                             |                              |
| <b>1</b>                         | 0                            | 0                           | 0                            |
| <b>2</b>                         | 50.9 (-29.5, 131.4) 0.216    | 36.7 (-22.6, 96.0) 0.225    | 46.1 (-1.1, 93.2) 0.056      |
| <b>3</b>                         | 40.5 (-79.6, 160.6) 0.509    | 61.9 (-31.8, 155.7) 0.196   | 60.4 (-12.2, 132.9) 0.103    |
| <b>CHD history</b>               |                              |                             |                              |
| <b>Yes</b>                       | 0                            | 0                           | 0                            |
| <b>No</b>                        | -78.7 (-148.6, -8.9) 0.028   | -23.0 (-84.8, 38.9) 0.467   | -49.5 (-95.3, -3.8) 0.034    |
| <b>hyperlipidemia history</b>    |                              |                             |                              |
| <b>Yes</b>                       | 0                            | 0                           | 0                            |
| <b>No</b>                        | -21.0 (-78.7, 36.7) 0.476    | 21.5 (-23.5, 66.6) 0.350    | 3.4 (-31.5, 38.2) 0.849      |
| <b>age at first gestation</b>    | 3.5 (-3.8, 10.8) 0.350       | -2.0 (-7.9, 3.9) 0.514      | 0.2 (-4.3, 4.7) 0.930        |
| <b>age at menopause</b>          | 0.4 (-2.0, 2.8) 0.751        | -0.6 (-3.1, 1.8) 0.617      | 0.1 (-1.6, 1.8) 0.922        |
| <b>number of pregnancies</b>     |                              |                             |                              |
| <b>0</b>                         | 0                            | 0                           | 0                            |
| <b>1</b>                         | 0                            | 0                           | 0                            |
| <b>2</b>                         | -10.2 (-114.6, 94.2) 0.848   | 15.3 (-46.3, 77.0) 0.626    | 0.3 (-52.7, 53.3) 0.990      |
| <b>3</b>                         | -3.3 (-111.8, 105.2) 0.953   | -7.6 (-73.2, 58.0) 0.820    | -20.0 (-75.6, 35.7) 0.482    |
| <b>4</b>                         | -33.8 (-155.5, 87.8) 0.586   | -16.2 (-95.6, 63.2) 0.689   | -33.2 (-98.6, 32.3) 0.321    |
| <b>5</b>                         | 38.5 (-109.0, 186.0) 0.609   | 5.9 (-103.1, 114.9) 0.915   | 9.1 (-76.3, 94.5) 0.834      |
| <b>6</b>                         | 26.8 (-193.5, 247.0) 0.812   | -21.3 (-234.2, 191.6) 0.845 | 9.6 (-137.9, 157.1) 0.898    |
| <b>8</b>                         | -344.6 (-660.4, -28.8) 0.033 | 0                           | -317.1 (-609.8, -24.4) 0.034 |
| <b>smoking status</b>            |                              |                             |                              |
| <b>No</b>                        | 0                            | 0                           | 0                            |
| <b>Occasional smokers</b>        | 121.7 (-101.5, 344.8) 0.286  | -130.3 (-349.0, 88.4) 0.243 | 13.3 (-139.1, 165.6) 0.864   |
| <b>Regular smokers</b>           | -51.3 (-275.2, 172.6) 0.654  | 14.6 (-113.9, 143.2) 0.823  | -22.9 (-134.2, 88.3) 0.686   |
| <b>drinking status</b>           |                              |                             |                              |
| <b>No</b>                        | 0                            | 0                           | 0                            |
| <b>Occasional drinkers</b>       | -137.2 (-251.1, -23.3) 0.019 | 17.1 (-53.3, 87.4) 0.635    | -30.1 (-90.0, 29.7) 0.324    |
| <b>Regular drinkers</b>          | 50.2 (-137.9, 238.4) 0.601   | 2.4 (-141.2, 146.1) 0.973   | 31.1 (-81.0, 143.1) 0.587    |
| <b>antihypertensive drug use</b> |                              |                             |                              |
| <b>Yes</b>                       | 0                            | 0                           | 0                            |
| <b>No</b>                        | -55.0 (-121.7, 11.8) 0.107   | 14.2 (-44.6, 73.0) 0.636    | -17.7 (-61.1, 25.6) 0.423    |

Adjusted model I adjusted for age; BMI; SBP; DBP; TG; LDL-C; HDL-C; FBG; PBG; HbA1c; baseline PWV; CHD history; hyperlipidemia history; age at first gestation; age at menopause; number of pregnancies; smoking status; drinking status; antihypertensive drug use; hypoglycemic drug use

**Table S12. Liner regression analysis between follow up PWV and the number of childbirths in diabetes history subgroups in Model II**

| Exposure                  | Diabetes Yes<br>B (95%CI) <i>P</i> -value | Diabetes No<br>B (95%CI) <i>P</i> -value | Total<br>B (95%CI) <i>P</i> -value |
|---------------------------|-------------------------------------------|------------------------------------------|------------------------------------|
| Age                       | 8.4 (0.5, 16.3) 0.038                     | 4.1 (-2.3, 10.5) 0.208                   | 6.0 (1.1, 10.9) 0.016              |
| BMI                       | -7.3 (-16.6, 1.9) 0.120                   | -5.4 (-11.8, 1.0) 0.101                  | -5.7 (-10.8, -0.6) 0.028           |
| SBP                       | -0.3 (-2.1, 1.6) 0.760                    | 1.7 (-0.1, 3.4) 0.060                    | 0.4 (-0.8, 1.7) 0.499              |
| DBP                       | 0.1 (-2.6, 2.9) 0.926                     | -1.2 (-4.1, 1.7) 0.425                   | 0.0 (-1.7, 1.8) 0.964              |
| TG                        | -23.3 (-77.2, 30.5) 0.396                 | 43.2 (-5.3, 91.7) 0.081                  | 4.9 (-29.6, 39.3) 0.782            |
| GGT                       | -1.2 (-2.8, 0.4) 0.141                    | -0.0 (-1.1, 1.1) 0.987                   | -0.6 (-1.5, 0.3) 0.219             |
| LDL_C                     | -80.1 (-238.6, 78.5) 0.323                | 54.6 (-100.0, 209.2) 0.489               | -40.0 (-147.4, 67.4) 0.466         |
| HDL_C                     | -63.9 (-230.8, 103.0) 0.454               | 58.9 (-87.1, 204.9) 0.429                | -37.4 (-142.9, 68.0) 0.487         |
| FBG                       | -10.8 (-30.2, 8.5) 0.274                  | -3.0 (-48.5, 42.4) 0.896                 | -7.2 (-23.6, 9.1) 0.387            |
| PBG                       | 5.9 (-2.3, 14.2) 0.160                    | 13.8 (0.2, 27.4) 0.047                   | 7.3 (0.7, 13.9) 0.030              |
| HbA1c                     | 18.6 (-15.9, 53.1) 0.291                  | -54.4 (-121.5, 12.7) 0.113               | 2.3 (-26.5, 31.1) 0.874            |
| Baseline PWV              | 0.3 (0.3, 0.4) <0.001                     | 0.5 (0.4, 0.5) <0.001                    | 0.4 (0.4, 0.5) <0.001              |
| The number of childbirths |                                           |                                          |                                    |
| 1                         | 0                                         | 0                                        | 0                                  |
| 2                         | 46.0 (-37.3, 129.3) 0.280                 | 33.0 (-27.4, 93.3) 0.285                 | 45.0 (-2.9, 92.9) 0.066            |
| 3                         | 36.2 (-88.5, 160.9) 0.569                 | 47.1 (-48.4, 142.6) 0.334                | 57.0 (-16.9, 131.0) 0.131          |
| CHD history               |                                           |                                          |                                    |
| Yes                       | 0                                         | 0                                        | 0                                  |
| No                        | -86.1 (-157.8, -14.4) 0.019               | -17.1 (-80.8, 46.6) 0.599                | -51.2 (-97.6, -4.7) 0.031          |
| hyperlipidemia history    |                                           |                                          |                                    |
| Yes                       | 0                                         | 0                                        | 0                                  |
| No                        | -19.2 (-79.9, 41.5) 0.535                 | 21.0 (-24.9, 66.8) 0.370                 | 3.8 (-32.0, 39.5) 0.837            |
| age at first gestation    | 2.5 (-5.2, 10.2) 0.521                    | -1.8 (-7.8, 4.2) 0.546                   | 0.3 (-4.4, 4.9) 0.911              |
| age at menopause          | 0.5 (-2.0, 3.0) 0.685                     | -0.6 (-3.1, 1.9) 0.644                   | 0.0 (-1.7, 1.7) 0.972              |
| number of pregnancies     |                                           |                                          |                                    |
| 0                         | 0                                         | 0                                        | 0                                  |
| 1                         | 0                                         | 0                                        | 0                                  |
| 2                         | -0.6 (-109.0, 107.8) 0.991                | 8.1 (-54.0, 70.1) 0.799                  | -0.4 (-54.3, 53.4) 0.988           |
| 3                         | 4.1 (-108.6, 116.8) 0.944                 | -18.5 (-84.8, 47.8) 0.584                | -21.3 (-77.9, 35.2) 0.460          |
| 4                         | -20.7 (-147.4, 106.0) 0.749               | -19.6 (-99.2, 60.1) 0.630                | -33.2 (-99.6, 33.2) 0.327          |
| 5                         | 70.7 (-83.5, 225.0) 0.369                 | -0.4 (-111.7, 110.9) 0.994               | 12.2 (-74.8, 99.2) 0.783           |
| 6                         | 45.2 (-181.2, 271.6) 0.696                | 1.0 (-217.3, 219.2) 0.993                | 16.6 (-133.0, 166.2) 0.828         |
| 8                         | -319.1 (-641.9, 3.7) 0.054                | 0                                        | -314.8 (-609.7, -19.8) 0.037       |
| smoking status            |                                           |                                          |                                    |
| No                        | 0                                         | 0                                        | 0                                  |
| Occasional smokers        | 101.5 (-128.2, 331.3) 0.387               | -139.0 (-358.4, 80.4) 0.215              | 15.5 (-138.1, 169.2) 0.843         |
| Regular smokers           | -34.0 (-288.0, 220.0) 0.793               | 36.8 (-96.1, 169.7) 0.587                | -15.6 (-129.8, 98.5) 0.789         |
| drinking status           |                                           |                                          |                                    |
| No                        | 0                                         | 0                                        | 0                                  |
| Occasional drinkers       | -156.7 (-275.4, -38.1) 0.010              | 5.9 (-65.8, 77.6) 0.871                  | -35.1 (-96.1, 25.8) 0.259          |

|                                                             |                              |                              |                              |
|-------------------------------------------------------------|------------------------------|------------------------------|------------------------------|
| <b>Regular drinkers</b>                                     | 58.4 (-139.4, 256.1) 0.563   | -1.0 (-148.6, 146.5) 0.989   | 19.0 (-95.3, 133.4) 0.744    |
| <b>antihypertensive drug use</b>                            |                              |                              |                              |
| <b>Yes</b>                                                  | 0                            | 0                            | 0                            |
| <b>No</b>                                                   | -51.6 (-120.9, 17.8) 0.146   | 16.2 (-43.5, 76.0) 0.594     | -13.0 (-57.1, 31.0) 0.562    |
| <b>TC</b>                                                   | 68.1 (-77.5, 213.7) 0.360    | -56.4 (-200.1, 87.3) 0.442   | 28.8 (-70.3, 127.9) 0.569    |
| <b>HDCP</b>                                                 |                              |                              |                              |
| <b>Yes</b>                                                  | 0                            | 0                            | 0                            |
| <b>No</b>                                                   | -3.6 (-101.3, 94.2) 0.943    | -96.3 (-177.2, -15.4) 0.020  | -35.0 (-96.4, 26.4) 0.264    |
| <b>GDM</b>                                                  |                              |                              |                              |
| <b>Yes</b>                                                  | 0                            | 0                            | 0                            |
| <b>No</b>                                                   | 169.8 (-429.0, 768.7) 0.579  | -30.2 (-382.5, 322.2) 0.867  | 82.2 (-215.2, 379.5) 0.588   |
| <b>Occupation</b>                                           |                              |                              |                              |
| <b>Worker</b>                                               | 0                            | 0                            | 0                            |
| <b>Famer</b>                                                | 210.6 (-442.6, 863.9) 0.528  | 0                            | 115.4 (-347.6, 578.4) 0.625  |
| <b>Cadre</b>                                                | -123.3 (-783.5, 536.9) 0.715 | 0                            | 12.0 (-604.3, 628.3) 0.969   |
| <b>Office and technical,<br/>personnel, doctor, teacher</b> | -105.0 (-647.2, 437.2) 0.705 | 53.4 (-367.1, 473.9) 0.804   | 119.7 (-288.2, 527.5) 0.565  |
| <b>Service worker</b>                                       | 0                            | 0                            | 0                            |
| <b>Housewife</b>                                            | -145.6 (-564.9, 273.7) 0.497 | -77.6 (-471.1, 315.8) 0.699  | -36.0 (-414.1, 342.0) 0.852  |
| <b>Unemployed</b>                                           | -116.3 (-499.6, 267.0) 0.552 | -161.1 (-518.0, 195.8) 0.377 | -40.0 (-399.0, 319.1) 0.827  |
| <b>Other</b>                                                | -82.6 (-555.7, 390.6) 0.732  | -65.3 (-503.2, 372.6) 0.770  | 16.1 (-385.0, 417.2) 0.937   |
| <b>Education</b>                                            |                              |                              |                              |
| <b>Illiterate</b>                                           | 0                            | 0                            | 0                            |
| <b>Primary school</b>                                       | 21.0 (-125.7, 167.6) 0.780   | 147.3 (15.8, 278.7) 0.028    | 71.4 (-24.0, 166.8) 0.143    |
| <b>Junior high school</b>                                   | 55.2 (-91.2, 201.6) 0.460    | 99.6 (-26.9, 226.1) 0.123    | 58.1 (-35.5, 151.8) 0.224    |
| <b>Senior high school</b>                                   | 58.2 (-96.5, 212.9) 0.462    | 82.6 (-45.7, 211.0) 0.207    | 51.1 (-45.6, 147.8) 0.300    |
| <b>College</b>                                              | 33.9 (-127.6, 195.4) 0.681   | 79.5 (-51.8, 210.8) 0.236    | 39.9 (-59.3, 139.2) 0.431    |
| <b>Marriage status</b>                                      |                              |                              |                              |
| <b>Married</b>                                              | 0                            | 0                            | 0                            |
| <b>Widowed</b>                                              | 0                            | 0                            | 0                            |
| <b>Separated</b>                                            | 55.3 (-37.7, 148.3) 0.245    | -21.6 (-89.0, 45.7) 0.529    | 11.3 (-42.5, 65.2) 0.680     |
| <b>Divorced</b>                                             | 0                            | -263.7 (-767.4, 240.0) 0.305 | -296.2 (-806.5, 214.1) 0.255 |

Adjusted model II adjusted for adjusted model I + TC; hypertensive disorder complicating pregnancy (HDCP); gestational diabetes mellitus (GDM);

**Table S13. Logistical regression analysis between change in PWV as a category variable in diabetes subgroups in Model I**

| Exposure               | Diabetes Yes<br>OR (95%CI) <i>P</i> -value | Diabetes No<br>OR (95%CI) <i>P</i> -value | Total<br>OR (95%CI) <i>P</i> -value |
|------------------------|--------------------------------------------|-------------------------------------------|-------------------------------------|
| Age                    | 1.0 (0.9, 1.0) 0.238                       | 1.0 (1.0, 1.1) 0.532                      | 1.0 (1.0, 1.0) 0.909                |
| BMI                    | 0.9 (0.9, 1.0) 0.162                       | 1.0 (1.0, 1.1) 0.507                      | 1.0 (0.9, 1.0) 0.649                |
| SBP                    | 1.0 (1.0, 1.0) 0.059                       | 1.0 (1.0, 1.0) 0.013                      | 1.0 (1.0, 1.0) <0.001               |
| DBP                    | 1.0 (1.0, 1.0) 0.236                       | 1.0 (1.0, 1.0) 0.813                      | 1.0 (1.0, 1.0) 0.284                |
| TG                     | 0.9 (0.6, 1.2) 0.470                       | 1.2 (1.0, 1.6) 0.085                      | 1.1 (0.9, 1.3) 0.464                |
| GGT                    | 1.0 (1.0, 1.0) 0.190                       | 1.0 (1.0, 1.0) 0.580                      | 1.0 (1.0, 1.0) 0.267                |
| LDL_C                  | 0.7 (0.5, 1.0) 0.036                       | 1.1 (0.8, 1.3) 0.656                      | 0.9 (0.8, 1.1) 0.255                |
| HDL_C                  | 0.6 (0.3, 1.5) 0.279                       | 1.2 (0.7, 2.2) 0.544                      | 1.0 (0.6, 1.5) 0.833                |
| FBG                    | 0.9 (0.7, 1.1) 0.205                       | 0.8 (0.5, 1.2) 0.270                      | 0.9 (0.8, 1.1) 0.274                |
| PBG                    | 1.0 (0.9, 1.1) 0.566                       | 1.0 (0.9, 1.2) 0.715                      | 1.0 (1.0, 1.1) 0.599                |
| HbA1c                  | 1.1 (0.8, 1.5) 0.592                       | 0.9 (0.5, 1.6) 0.626                      | 1.0 (0.8, 1.4) 0.761                |
| The number of          |                                            |                                           |                                     |
| childbirths            |                                            |                                           |                                     |
| 1                      | 1.0                                        | 1.0                                       | 1.0                                 |
| 2                      | 3.5 (1.5, 7.9) 0.003                       | 1.0 (0.6, 1.7) 0.910                      | 1.4 (0.9, 2.2) 0.122                |
| 3                      | 4.4 (1.3, 14.5) 0.015                      | 1.0 (0.4, 2.4) 0.925                      | 1.6 (0.8, 3.1) 0.198                |
| CHD history            |                                            |                                           |                                     |
| Yes                    | 1.0                                        | 1.0                                       | 1.0                                 |
| No                     | 0.8 (0.4, 1.4) 0.415                       | 1.1 (0.6, 1.9) 0.845                      | 0.9 (0.6, 1.3) 0.516                |
| hyperlipidemia history |                                            |                                           |                                     |
| Yes                    | 1.0                                        | 1.0                                       | 1.0                                 |
| No                     | 0.7 (0.4, 1.1) 0.120                       | 1.0 (0.6, 1.5) 0.877                      | 0.8 (0.6, 1.1) 0.202                |
| age at first gestation | 1.0 (1.0, 1.1) 0.417                       | 1.0 (1.0, 1.1) 0.706                      | 1.0 (1.0, 1.1) 0.472                |
| age at menopause       | 1.0 (1.0, 1.0) 0.946                       | 1.0 (1.0, 1.0) 0.912                      | 1.0 (1.0, 1.0) 0.867                |
| number of pregnancies  |                                            |                                           |                                     |
| 0                      | 1.0                                        | 1.0                                       | 1.0                                 |
| 1                      | 1.0                                        | 1.0                                       | 1.0                                 |
| 2                      | 0.5 (0.2, 1.3) 0.146                       | 1.1 (0.6, 1.9) 0.770                      | 0.9 (0.5, 1.4) 0.526                |
| 3                      | 0.5 (0.2, 1.5) 0.208                       | 1.0 (0.5, 1.9) 0.968                      | 0.8 (0.5, 1.3) 0.339                |
| 4                      | 0.4 (0.1, 1.2) 0.109                       | 0.8 (0.4, 1.8) 0.653                      | 0.7 (0.4, 1.2) 0.192                |
| 5                      | 0.9 (0.2, 3.4) 0.839                       | 0.9 (0.3, 2.6) 0.821                      | 1.1 (0.5, 2.4) 0.806                |
| 6                      | 1.6 (0.2, 10.6) 0.636                      | 1.8 (0.3, 11.8) 0.556                     | 2.0 (0.6, 6.8) 0.290                |
| 8                      | 0.0 (0.0, Inf) 0.984                       | 1.0                                       | 0.0 (0.0, Inf) 0.978                |
| smoking status         |                                            |                                           |                                     |
| No                     | 1.0                                        | 1.0                                       | 1.0                                 |
| Occasional smokers     | 1.6 (0.3, 10.1) 0.590                      | 0.8 (0.1, 7.2) 0.817                      | 1.4 (0.4, 5.1) 0.607                |
| Regular smokers        | 1.4 (0.2, 10.2) 0.727                      | 1.0 (0.3, 3.4) 0.986                      | 0.9 (0.3, 2.5) 0.892                |
| drinking status        |                                            |                                           |                                     |
| No                     | 1.0                                        | 1.0                                       | 1.0                                 |
| Occasional drinkers    | 0.6 (0.2, 2.0) 0.403                       | 1.3 (0.7, 2.4) 0.446                      | 1.0 (0.6, 1.8) 0.885                |

|                                  |                      |                      |                      |
|----------------------------------|----------------------|----------------------|----------------------|
| <b>Regular drinkers</b>          | 1.6 (0.3, 8.2) 0.599 | 0.7 (0.1, 3.4) 0.657 | 1.0 (0.3, 2.8) 0.972 |
| <b>antihypertensive drug use</b> |                      |                      |                      |
| <b>Yes</b>                       | 1.0                  | 1.0                  | 1.0                  |
| <b>No</b>                        | 0.8 (0.4, 1.5) 0.535 | 1.1 (0.6, 2.0) 0.650 | 1.0 (0.6, 1.4) 0.818 |

Adjusted model I adjusted for age; BMI; SBP; DBP; TG; LDL-C; HDL-C; FBG; PBG; HbA1c; CHD history; hyperlipidemia history; age at first gestation; age at menopause; number of pregnancies; smoking status; drinking status; antihypertensive drug use; hypoglycemic drug use



**Table S14. Logistical regression analysis between change in PWV as a category variable in diabetes subgroups in Model II**

| Exposure                     | Diabetes Yes<br>OR (95%CI) <i>P</i> -value | Diabetes No<br>OR (95%CI) <i>P</i> -value | Total<br>OR (95%CI) <i>P</i> -value |
|------------------------------|--------------------------------------------|-------------------------------------------|-------------------------------------|
| Age                          | 1.0 (0.9, 1.0) 0.398                       | 1.0 (1.0, 1.1) 0.287                      | 1.0 (1.0, 1.1) 0.689                |
| BMI                          | 0.9 (0.8, 1.0) 0.075                       | 1.0 (1.0, 1.1) 0.523                      | 1.0 (0.9, 1.0) 0.549                |
| SBP                          | 1.0 (1.0, 1.0) 0.016                       | 1.0 (1.0, 1.0) 0.009                      | 1.0 (1.0, 1.0) <0.001               |
| DBP                          | 1.0 (1.0, 1.1) 0.005                       | 1.0 (1.0, 1.0) 0.815                      | 1.0 (1.0, 1.0) 0.011                |
| TG                           | 0.7 (0.4, 1.2) 0.201                       | 1.6 (1.0, 2.5) 0.065                      | 1.1 (0.8, 1.5) 0.697                |
| GGT                          | 1.0 (1.0, 1.0) 0.137                       | 1.0 (1.0, 1.0) 0.487                      | 1.0 (1.0, 1.0) 0.230                |
| LDL_C                        | 0.3 (0.1, 1.5) 0.133                       | 2.1 (0.5, 9.2) 0.322                      | 0.8 (0.3, 2.1) 0.611                |
| HDL_C                        | 0.3 (0.1, 1.5) 0.136                       | 2.2 (0.5, 9.2) 0.263                      | 0.9 (0.3, 2.3) 0.766                |
| FBG                          | 0.9 (0.7, 1.1) 0.211                       | 0.8 (0.5, 1.2) 0.318                      | 0.9 (0.8, 1.1) 0.309                |
| PBG                          | 1.0 (0.9, 1.1) 0.683                       | 1.1 (0.9, 1.2) 0.460                      | 1.0 (1.0, 1.1) 0.611                |
| HbA1c                        | 1.1 (0.8, 1.5) 0.599                       | 0.8 (0.4, 1.5) 0.499                      | 1.0 (0.8, 1.4) 0.892                |
| The number of<br>childbirths |                                            |                                           |                                     |
| 1                            | 1.0                                        | 1.0                                       | 1.0                                 |
| 2                            | 3.1 (1.3, 7.2) 0.009                       | 0.9 (0.5, 1.6) 0.781                      | 1.4 (0.9, 2.1) 0.182                |
| 3                            | 4.1 (1.2, 14.3) 0.028                      | 0.8 (0.3, 2.1) 0.680                      | 1.5 (0.8, 3.0) 0.239                |
| CHD history                  |                                            |                                           |                                     |
| Yes                          | 1.0                                        | 1.0                                       | 1.0                                 |
| No                           | 0.8 (0.4, 1.6) 0.550                       | 1.1 (0.6, 2.0) 0.765                      | 0.9 (0.6, 1.4) 0.610                |
| hyperlipidemia history       |                                            |                                           |                                     |
| Yes                          | 1.0                                        | 1.0                                       | 1.0                                 |
| No                           | 0.6 (0.3, 1.1) 0.096                       | 1.0 (0.6, 1.6) 0.990                      | 0.8 (0.6, 1.2) 0.262                |
| age at first gestation       | 1.0 (1.0, 1.1) 0.370                       | 1.0 (1.0, 1.1) 0.779                      | 1.0 (1.0, 1.1) 0.414                |
| age at menopause             | 1.0 (1.0, 1.0) 0.973                       | 1.0 (1.0, 1.0) 0.979                      | 1.0 (1.0, 1.0) 0.938                |
| number of<br>pregnancies     |                                            |                                           |                                     |
| 0                            | 1.0                                        | 1.0                                       | 1.0                                 |
| 1                            | 1.0                                        | 1.0                                       | 1.0                                 |
| 2                            | 0.6 (0.2, 1.6) 0.285                       | 1.0 (0.6, 1.8) 0.998                      | 0.8 (0.5, 1.4) 0.490                |
| 3                            | 0.5 (0.2, 1.5) 0.235                       | 0.9 (0.5, 1.7) 0.806                      | 0.7 (0.4, 1.2) 0.240                |
| 4                            | 0.4 (0.1, 1.4) 0.160                       | 0.8 (0.4, 1.7) 0.503                      | 0.6 (0.3, 1.2) 0.141                |
| 5                            | 1.4 (0.3, 5.9) 0.632                       | 0.8 (0.3, 2.3) 0.656                      | 1.1 (0.5, 2.4) 0.845                |
| 6                            | 2.2 (0.3, 16.5) 0.434                      | 2.2 (0.3, 15.9) 0.421                     | 2.1 (0.6, 7.4) 0.256                |
| 8                            | 0.0 (0.0, Inf) 0.989                       | 1.0                                       | 0.0 (0.0, Inf) 0.978                |
| smoking status               |                                            |                                           |                                     |
| No                           | 1.0                                        | 1.0                                       | 1.0                                 |
| Occasional smokers           | 1.7 (0.3, 11.7) 0.569                      | 0.8 (0.1, 7.7) 0.840                      | 1.5 (0.4, 5.5) 0.547                |
| Regular smokers              | 2.3 (0.3, 20.1) 0.458                      | 1.2 (0.3, 4.4) 0.786                      | 1.0 (0.4, 2.9) 0.970                |
| drinking status              |                                            |                                           |                                     |

|                                                 |                            |                       |                           |
|-------------------------------------------------|----------------------------|-----------------------|---------------------------|
| No                                              | 1.0                        | 1.0                   | 1.0                       |
| Occasional drinkers                             | 0.5 (0.1, 1.8) 0.284       | 1.1 (0.6, 2.2) 0.702  | 1.0 (0.5, 1.7) 0.881      |
| Regular drinkers                                | 0.9 (0.1, 5.6) 0.922       | 0.6 (0.1, 3.4) 0.597  | 0.8 (0.3, 2.5) 0.703      |
| antihypertensive drug use                       |                            |                       |                           |
| Yes                                             | 1.0                        | 1.0                   | 1.0                       |
| No                                              | 0.8 (0.4, 1.4) 0.383       | 1.2 (0.7, 2.1) 0.580  | 0.9 (0.6, 1.4) 0.697      |
| TC                                              | 2.3 (0.5, 9.8) 0.271       | 0.5 (0.1, 2.1) 0.357  | 1.2 (0.5, 2.8) 0.754      |
| HDCP                                            |                            |                       |                           |
| Yes                                             | 1.0                        | 1.0                   | 1.0                       |
| No                                              | 1.0 (0.4, 2.5) 0.954       | 0.6 (0.3, 1.3) 0.238  | 0.8 (0.5, 1.5) 0.550      |
| GDM                                             |                            |                       |                           |
| Yes                                             | 1.0                        | 1.0                   | 1.0                       |
| No                                              | 4600932.3 (0.0, Inf) 0.995 | 0.4 (0.0, 7.8) 0.555  | 0.8 (0.1, 10.7) 0.898     |
| occupation                                      |                            |                       |                           |
| Worker                                          | 1.0                        | 1.0                   | 1.0                       |
| Famer                                           | 6017287.8 (0.0, Inf) 0.995 | 1.0                   | 0.6 (0.0, 28.1) 0.768     |
| Cadre                                           | 2713105.5 (0.0, Inf) 0.995 | 1.0                   | 543754.7 (0.0, Inf) 0.988 |
| Office and technical personnel, doctor, teacher | 0.0 (0.0, Inf) 0.990       | 0.9 (0.0, 32.5) 0.960 | 0.2 (0.0, 6.6) 0.379      |
| Service worker                                  | 1.0                        | 1.0                   | 1.0                       |
| Housewife                                       | 0.1 (0.0, 2.3) 0.129       | 0.3 (0.0, 9.8) 0.511  | 0.1 (0.0, 2.5) 0.163      |
| Unemployed                                      | 0.0 (0.0, 1.1) 0.058       | 0.2 (0.0, 3.8) 0.271  | 0.1 (0.0, 1.9) 0.121      |
| Other                                           | 0.1 (0.0, 4.5) 0.201       | 0.2 (0.0, 8.7) 0.382  | 0.1 (0.0, 2.5) 0.150      |
| Education                                       |                            |                       |                           |
| Illiterate                                      | 1.0                        | 1.0                   | 1.0                       |
| Primary school                                  | 1.5 (0.4, 6.6) 0.561       | 2.4 (0.6, 10.0) 0.229 | 1.6 (0.6, 4.1) 0.325      |
| Junior high school                              | 1.2 (0.3, 5.2) 0.788       | 1.6 (0.4, 6.6) 0.489  | 1.2 (0.5, 2.9) 0.764      |
| Senior high school                              | 1.7 (0.4, 8.2) 0.483       | 2.0 (0.5, 8.3) 0.320  | 1.5 (0.6, 3.8) 0.432      |
| College                                         | 0.7 (0.1, 4.0) 0.727       | 2.0 (0.5, 8.2) 0.356  | 1.2 (0.4, 3.2) 0.733      |
| Marriage status                                 |                            |                       |                           |
| Married                                         | 1.0                        | 1.0                   | 1.0                       |
| Widowed                                         | 1.0                        | 1.0                   | 1.0                       |
| Separated                                       | 1.1 (0.4, 2.7) 0.883       | 1.0 (0.5, 2.0) 0.919  | 1.1 (0.6, 1.8) 0.823      |
| Divorced                                        | 1.0                        | 0.0 (0.0, Inf) 0.981  | 0.0 (0.0, Inf) 0.987      |

Adjusted model II adjusted for adjusted model I + TC; hypertensive disorder complicating pregnancy (HDCP); gestational diabetes mellitus (GDM);

**Table S15. Liner regression analysis between change in PWV as a continuous variable in diabetes subgroups in Model I**

| Exposure                      | Diabetes Yes                 | Diabetes No                 | Total                        |
|-------------------------------|------------------------------|-----------------------------|------------------------------|
| <b>Age</b>                    | -5.5 (-14.7, 3.8) 0.246      | -10.1 (-16.9, -3.4) 0.004   | -7.7 (-13.1, -2.4) 0.005     |
| <b>BMI</b>                    | 0.6 (-10.9, 12.0) 0.924      | -0.3 (-7.5, 7.0) 0.940      | -0.9 (-6.9, 5.2) 0.781       |
| <b>SBP</b>                    | -5.4 (-7.6, -3.2) <0.001     | -3.9 (-5.6, -2.1) <0.001    | -4.9 (-6.2, -3.6) <0.001     |
| <b>DBP</b>                    | 2.0 (0.0, 4.0) 0.047         | -1.0 (-4.1, 2.2) 0.558      | 1.5 (0.0, 2.9) 0.047         |
| <b>TG</b>                     | -0.6 (-46.4, 45.1) 0.978     | 9.3 (-22.2, 40.8) 0.562     | 2.9 (-22.7, 28.4) 0.827      |
| <b>GGT</b>                    | -1.4 (-3.5, 0.7) 0.194       | 0.2 (-1.1, 1.5) 0.734       | -0.4 (-1.6, 0.7) 0.439       |
| <b>LDL_C</b>                  | -9.5 (-49.7, 30.6) 0.643     | -4.3 (-32.4, 23.9) 0.767    | -7.4 (-30.2, 15.4) 0.523     |
| <b>HDL_C</b>                  | 18.3 (-100.7, 137.3) 0.763   | -8.3 (-81.5, 65.0) 0.825    | -3.4 (-65.2, 58.4) 0.915     |
| <b>FBG</b>                    | -7.1 (-32.4, 18.2) 0.582     | -36.9 (-88.6, 14.8) 0.162   | -9.2 (-29.0, 10.6) 0.364     |
| <b>PBG</b>                    | 4.9 (-5.6, 15.5) 0.362       | 6.5 (-8.9, 21.9) 0.411      | 5.7 (-2.2, 13.7) 0.157       |
| <b>HbA1c</b>                  | -8.5 (-52.9, 35.8) 0.706     | -55.0 (-132.0, 22.0) 0.162  | -13.1 (-47.8, 21.5) 0.458    |
| <b>The number of</b>          |                              |                             |                              |
| <b>childbirths</b>            |                              |                             |                              |
| <b>1</b>                      | 0                            | 0                           | 0                            |
| <b>2</b>                      | 130.3 (22.4, 238.1) 0.018    | 10.1 (-58.7, 78.9) 0.773    | 52.8 (-5.0, 110.6) 0.074     |
| <b>3</b>                      | 140.5 (-21.0, 302.1) 0.089   | 59.1 (-49.4, 167.5) 0.286   | 87.2 (-1.5, 175.9) 0.054     |
| <b>CHD history</b>            |                              |                             |                              |
| <b>Yes</b>                    | 0                            | 0                           | 0                            |
| <b>No</b>                     | -55.3 (-149.6, 39.0) 0.251   | -37.4 (-108.8, 34.1) 0.306  | -54.5 (-110.6, 1.6) 0.057    |
| <b>hyperlipidemia</b>         |                              |                             |                              |
| <b>history</b>                |                              |                             |                              |
| <b>Yes</b>                    | 0                            | 0                           | 0                            |
| <b>No</b>                     | -13.6 (-91.5, 64.3) 0.732    | 3.4 (-48.1, 55.0) 0.896     | -9.2 (-51.7, 33.3) 0.671     |
| <b>age at first gestation</b> | 0.5 (-9.3, 10.4) 0.915       | -1.7 (-8.5, 5.1) 0.628      | -0.2 (-5.7, 5.3) 0.949       |
| <b>age at menopause</b>       | 0.1 (-3.1, 3.4) 0.927        | -1.1 (-3.9, 1.8) 0.454      | -0.2 (-2.3, 1.8) 0.813       |
| <b>number of</b>              |                              |                             |                              |
| <b>pregnancies</b>            |                              |                             |                              |
| <b>0</b>                      | 0                            | 0                           | 0                            |
| <b>1</b>                      | 0                            | 0                           | 0                            |
| <b>2</b>                      | -50.0 (-190.3, 90.2) 0.485   | 25.2 (-46.2, 96.7) 0.489    | -1.3 (-66.2, 63.6) 0.968     |
| <b>3</b>                      | -109.8 (-255.2, 35.6) 0.140  | 13.5 (-62.5, 89.5) 0.728    | -34.5 (-102.6, 33.7) 0.322   |
| <b>4</b>                      | -88.5 (-252.5, 75.5) 0.291   | 46.7 (-44.9, 138.3) 0.318   | -5.7 (-85.9, 74.5) 0.889     |
| <b>5</b>                      | -49.7 (-248.5, 149.1) 0.624  | 41.3 (-85.0, 167.6) 0.522   | 13.3 (-91.4, 118.0) 0.804    |
| <b>6</b>                      | -36.6 (-334.1, 260.8) 0.809  | -48.0 (-295.4, 199.4) 0.704 | -10.1 (-191.2, 170.9) 0.913  |
| <b>8</b>                      | -307.3 (-734.0, 119.4) 0.159 | 0                           | -248.8 (-608.1, 110.4) 0.175 |
| <b>smoking status</b>         |                              |                             |                              |
| <b>No</b>                     | 0                            | 0                           | 0                            |
| <b>Occasional smokers</b>     | 171.3 (-128.3, 470.9) 0.263  | -52.1 (-305.9, 201.7) 0.688 | 96.0 (-90.7, 282.7) 0.314    |
| <b>Regular smokers</b>        | -49.3 (-351.7, 253.1) 0.750  | 53.4 (-91.1, 197.9) 0.469   | 20.3 (-113.0, 153.6) 0.765   |

| drinking status           |                            |                           |                            |
|---------------------------|----------------------------|---------------------------|----------------------------|
| No                        | 0                          | 0                         | 0                          |
| Occasional drinkers       | -50.9 (-200.5, 98.6) 0.505 | 21.9 (-59.9, 103.7) 0.601 | -4.1 (-77.0, 68.8) 0.913   |
| Regular drinkers          | 62.3 (-190.9, 315.5) 0.630 | 6.8 (-160.1, 173.7) 0.936 | 18.3 (-119.1, 155.6) 0.795 |
| antihypertensive drug use |                            |                           |                            |
| Yes                       | 0                          | 0                         | 0                          |
| No                        | -1.1 (-90.9, 88.7) 0.981   | 31.9 (-36.5, 100.2) 0.361 | 12.0 (-41.1, 65.1) 0.658   |

Adjusted model I adjusted for age; BMI; SBP; DBP; TG; GGT; LDL-C; HDL-C; FBG; PBG; HbA1c; CHD history; hyperlipidemia history; age at first gestation; age at menopause; number of pregnancies; smoking status; drinking status; antihypertensive drug use; hypoglycemic drug use

**Table S16. Liner regression analysis between change in PWV as a continuous variable in diabetes subgroups in Model II**

| Exposure                  | Diabetes Yes                 | Diabetes No                | Total                       |
|---------------------------|------------------------------|----------------------------|-----------------------------|
| Age                       | -5.3 (-15.6, 5.1) 0.320      | -7.8 (-15.0, -0.6) 0.034   | -6.2 (-12.0, -0.3) 0.038    |
| BMI                       | -0.9 (-13.2, 11.5) 0.891     | -0.2 (-7.6, 7.3) 0.964     | -1.7 (-7.9, 4.5) 0.595      |
| SBP                       | -5.9 (-8.2, -3.6) <0.001     | -4.3 (-6.0, -2.5) <0.001   | -5.5 (-6.9, -4.2) <0.001    |
| DBP                       | 5.6 (1.9, 9.2) 0.003         | 0.1 (-3.3, 3.4) 0.964      | 4.4 (2.3, 6.5) <0.001       |
| TG                        | -19.1 (-91.3, 53.1) 0.604    | 46.3 (-10.0, 102.7) 0.108  | 6.5 (-35.6, 48.6) 0.763     |
| GGT                       | -1.7 (-3.8, 0.5) 0.127       | 0.1 (-1.2, 1.4) 0.861      | -0.6 (-1.7, 0.6) 0.337      |
| LDL_C                     | -104.8 (-317.3, 107.7) 0.334 | 114.3 (-65.2, 293.8) 0.212 | -10.1 (-141.4, 121.1) 0.880 |
| HDL_C                     | -61.4 (-285.1, 162.3) 0.591  | 104.0 (-65.6, 273.6) 0.230 | 0.8 (-128.1, 129.7) 0.990   |
| FBG                       | -8.3 (-34.2, 17.7) 0.532     | -21.4 (-74.2, 31.3) 0.426  | -8.2 (-28.2, 11.8) 0.422    |
| PBG                       | 4.8 (-6.3, 15.8) 0.401       | 10.9 (-4.9, 26.7) 0.176    | 6.5 (-1.5, 14.6) 0.112      |
| HbA1c                     | -9.1 (-55.1, 37.0) 0.700     | -61.5 (-139.5, 16.5) 0.123 | -16.6 (-51.7, 18.5) 0.355   |
| The number of childbirths |                              |                            |                             |
| 1                         | 0                            | 0                          | 0                           |
| 2                         | 105.1 (-6.1, 216.3) 0.065    | 11.1 (-58.9, 81.2) 0.755   | 49.1 (-9.5, 107.6) 0.101    |
| 3                         | 118.1 (-48.5, 284.7) 0.166   | 45.2 (-65.8, 156.2) 0.425  | 76.3 (-14.1, 166.7) 0.098   |
| CHD history               |                              |                            |                             |
| Yes                       | 0                            | 0                          | 0                           |
| No                        | -47.1 (-143.0, 48.8) 0.336   | -29.5 (-103.5, 44.5) 0.435 | -51.5 (-108.3, 5.3) 0.076   |
| hyperlipidemia history    |                              |                            |                             |
| Yes                       | 0                            | 0                          | 0                           |
| No                        | -10.3 (-91.7, 71.0) 0.803    | 5.7 (-47.5, 59.0) 0.833    | -10.8 (-54.4, 32.9) 0.629   |
| age at first gestation    | 1.3 (-8.9, 11.6) 0.799       | -1.7 (-8.7, 5.3) 0.636     | 0.4 (-5.2, 6.1) 0.885       |
| age at menopause          | -0.1 (-3.4, 3.2) 0.941       | -0.9 (-3.8, 2.0) 0.545     | -0.4 (-2.5, 1.6) 0.680      |
| number of pregnancies     |                              |                            |                             |
| 0                         | 0                            | 0                          | 0                           |

|                                                 |                               |                              |                              |
|-------------------------------------------------|-------------------------------|------------------------------|------------------------------|
| 1                                               | 0                             | 0                            | 0                            |
| 2                                               | -22.7 (-167.9, 122.6) 0.760   | 13.0 (-59.1, 85.1) 0.724     | -3.4 (-69.3, 62.4) 0.919     |
| 3                                               | -98.6 (-248.8, 51.5) 0.199    | 0.4 (-76.6, 77.3) 0.993      | -39.3 (-108.4, 29.8) 0.265   |
| 4                                               | -68.8 (-238.5, 100.9) 0.427   | 30.0 (-62.2, 122.3) 0.524    | -14.2 (-95.4, 67.0) 0.732    |
| 5                                               | -7.8 (-214.1, 198.6) 0.941    | 28.5 (-100.8, 157.8) 0.666   | 10.6 (-95.8, 116.9) 0.846    |
| 6                                               | -15.6 (-318.9, 287.6) 0.920   | -24.0 (-277.7, 229.7) 0.853  | -10.1 (-192.9, 172.7) 0.914  |
| 8                                               | -312.1 (-744.8, 120.5) 0.158  | 0                            | -280.0 (-640.4, 80.5) 0.128  |
| smoking status                                  |                               |                              |                              |
| No                                              | 0                             | 0                            | 0                            |
| Occasional smokers                              | 151.8 (-156.0, 459.6) 0.334   | -58.3 (-313.0, 196.4) 0.654  | 93.9 (-93.8, 281.6) 0.327    |
| Regular smokers                                 | 56.7 (-283.4, 396.8) 0.744    | 86.7 (-67.6, 241.0) 0.271    | 34.6 (-104.8, 174.0) 0.627   |
| drinking status                                 |                               |                              |                              |
| No                                              | 0                             | 0                            | 0                            |
| Occasional drinkers                             | -81.4 (-240.0, 77.2) 0.315    | 11.8 (-71.6, 95.1) 0.782     | -11.3 (-85.8, 63.2) 0.766    |
| Regular drinkers                                | 25.9 (-239.1, 290.8) 0.848    | -11.2 (-182.7, 160.4) 0.898  | -3.9 (-143.6, 135.8) 0.956   |
| antihypertensive drug use                       |                               |                              |                              |
| Yes                                             | 0                             | 0                            | 0                            |
| No                                              | -9.1 (-101.8, 83.6) 0.848     | 37.6 (-31.7, 107.0) 0.288    | 8.2 (-45.6, 62.0) 0.765      |
| TC                                              | 82.3 (-112.8, 277.4) 0.409    | -110.7 (-277.5, 56.1) 0.194  | -0.5 (-121.6, 120.6) 0.993   |
| HDCP                                            |                               |                              |                              |
| Yes                                             | 0                             | 0                            | 0                            |
| No                                              | 116.4 (-13.2, 246.0) 0.079    | -35.8 (-129.3, 57.8) 0.454   | 46.4 (-28.1, 121.0) 0.223    |
| GDM                                             |                               |                              |                              |
| Yes                                             | 0                             | 0                            | 0                            |
| No                                              | 417.5 (-384.2, 1219.1) 0.308  | -112.8 (-522.2, 296.5) 0.589 | 51.5 (-311.9, 415.0) 0.781   |
| Occupation                                      |                               |                              |                              |
| Worker                                          | 0                             | 0                            | 0                            |
| Farmer                                          | 44.1 (-830.9, 919.2) 0.921    | 0                            | 38.6 (-527.2, 604.5) 0.894   |
| Cadre                                           | -65.8 (-950.5, 818.9) 0.884   | 0                            | 61.5 (-691.7, 814.8) 0.873   |
| Office and technical personnel, doctor, teacher | -312.1 (-1038.1, 413.8) 0.400 | 28.6 (-460.2, 517.4) 0.909   | -14.7 (-513.0, 483.6) 0.954  |
| Service worker                                  | 0                             | 0                            | 0                            |
| Housewife                                       | -331.4 (-892.5, 229.8) 0.248  | -147.0 (-604.2, 310.2) 0.529 | -195.2 (-656.9, 266.6) 0.408 |
| Unemployed                                      | -249.3 (-762.5, 264.0) 0.342  | -164.1 (-579.0, 250.8) 0.439 | -143.8 (-582.5, 294.8) 0.521 |
| Other                                           | -206.6 (-840.4, 427.2) 0.523  | -189.6 (-698.3, 319.1) 0.465 | -154.8 (-644.7, 335.1) 0.536 |
| Education                                       |                               |                              |                              |
| Illiterate                                      | 0                             | 0                            | 0                            |
| Primary school                                  | 29.5 (-167.0, 226.0) 0.769    | 100.7 (-51.9, 253.3) 0.196   | 41.0 (-75.5, 157.6) 0.490    |
| Junior high school                              | -9.1 (-205.0, 186.9) 0.928    | 77.6 (-69.4, 224.7) 0.301    | 11.7 (-102.7, 126.1) 0.841   |
| Senior high school                              | 8.5 (-198.7, 215.7) 0.936     | 57.3 (-91.8, 206.5) 0.451    | 7.1 (-111.0, 125.2) 0.906    |
| College                                         | -0.4 (-216.8, 216.0) 0.997    | 58.8 (-93.8, 211.3) 0.451    | 1.2 (-120.0, 122.5) 0.984    |

| Marriage status |                     |       |                        |       |                              |
|-----------------|---------------------|-------|------------------------|-------|------------------------------|
| Married         | 0                   |       | 0                      |       | 0                            |
| Widowed         | 0                   |       | 0                      |       | 0                            |
| Separated       | 60.1 (-64.6, 184.8) | 0.345 | -8.0 (-86.2, 70.2)     | 0.841 | 24.6 (-41.2, 90.4) 0.464     |
| Divorced        | 0                   |       | -258.9 (-844.5, 326.6) | 0.386 | -312.4 (-936.1, 311.4) 0.327 |

Adjusted model II adjusted for adjusted model I + TC; hypertensive disorder complicating pregnancy (HDCP); gestational diabetes mellitus (GDM)

| Exposure | N | % | Non-adjusted               | Adjust I                   | Adjust II                  |
|----------|---|---|----------------------------|----------------------------|----------------------------|
|          |   |   | OR (95%CI) <i>P</i> -value | OR (95%CI) <i>P</i> -value | OR (95%CI) <i>P</i> -value |

#### PWV (cm/s) Category

| The number of childbirths |     |      |                      |                      |                      |
|---------------------------|-----|------|----------------------|----------------------|----------------------|
| 1                         | 527 | 24.1 | 1.0                  | 1.0                  | 1.0                  |
| 2                         | 383 | 26.4 | 1.2 (0.9, 1.6) 0.282 | 1.4 (0.9, 2.2) 0.107 | 1.4 (0.9, 2.2) 0.124 |
| ≥3                        | 249 | 25.7 | 1.2 (0.8, 1.7) 0.395 | 1.6 (0.8, 3.1) 0.189 | 1.6 (0.8, 3.1) 0.195 |
| P for trend               |     |      | 0.346                | 0.179                | 0.177                |

#### Continuous PWV (cm/s)

| The number of childbirths |     |      |                           |                          |                          |
|---------------------------|-----|------|---------------------------|--------------------------|--------------------------|
| 1                         | 527 | 24.1 | 0                         | 0                        | 0                        |
| 2                         | 383 | 26.4 | -3.5 (-45.9, 38.9) 0.872  | 52.5 (-5.3, 110.3) 0.076 | 55.0 (-3.9, 113.8) 0.067 |
| ≥3                        | 249 | 25.7 | -30.7 (-79.4, 18.1) 0.218 | 81.7 (-7.0, 170.5) 0.071 | 83.5 (-7.1, 174.1) 0.071 |
| P for trend               |     |      | 0.256                     | 0.058                    | 0.056                    |

Non-adjusted model adjusted for nothing

Adjusted model I adjusted for age; BMI; SBP; DBP; TG; GGT; LDL-C; HDL-C; FBG; PBG; HbA1c ; CHD history; hyperlipidemia history; age at first

gestation; age at menopause; number of pregnancies; smoking status; drinking status; antihypertensive drug use; hypoglycemic drug use

Adjusted model II adjusted for adjusted model I + TC; hypertensive disorder complicating pregnancy (HDCP); gestational diabetes mellitus (GDM)
